# Supplementary material for: Cyclometalated and NNN Terpyridine Ruthenium Photocatalysts and Their Cytotoxic Activity
Source: MDPI journal article supplement (doi:10.3390/molecules29092146), 2024-05-05
Supplement: s1 [file s1]

## Cyclometalated and NNN Terpyridine Ruthenium Photocatalysts and their Cytotoxic Activity

Maurizio Ballico<sup>1,\*</sup>, Dario Alessi<sup>1</sup>, Eleonora Aneggi<sup>1</sup>, Marta Busato<sup>1</sup>, Daniele Zuccaccia<sup>1</sup>, Lorenzo Allegri<sup>2</sup>, Giuseppe Damante<sup>2</sup>, Christian Jandl<sup>3</sup> and Walter Baratta<sup>1,\*</sup>

<sup>1</sup>Dipartimento di Scienze Agroalimentari, Ambientali e Animali, Università di Udine, Via Cotonificio 108, I-33100 Udine, Italy; alessi.dario@spes.uniud.it (D.A.); eleonora.aneggi@uniud.it (E.A.); marta.busato@uniud.it (M.B.); daniele.zuccaccia@uniud.it (D.Z.) <sup>2</sup>Dipartimento di Area Medica – Istituto di Genetica Medica, Università di Udine, Via Chiusaforte, F3, I-33100 Udine, Italy; allegri.lorenzo@spes.uniud.it (L.A.); giuseppe.damante@uniud.it (G.D.) <sup>3</sup>Department of Chemistry & Catalysis Research Center, Technische Universität München, Ernst-Otto-Fischer-Str. 1, 85748 Garching b. München, Germany; christian.jandl@tum.de (C.J.)

\* Correspondence: maurizio.ballico@uniud.it; walter.baratta@uniud.it

### Supporting Information

#### Table of Contents:

|                                                                                                                                         |          |
|-----------------------------------------------------------------------------------------------------------------------------------------|----------|
| <b>Figure S1.</b> <sup>31</sup> P{ <sup>1</sup> H} NMR spectrum of [Ru(η <sup>2</sup> -OAc)(NC-tpy)(dppb)] ( <b>1</b> )                 | Pag. S5  |
| <b>Figure S2.</b> <sup>1</sup> H NMR spectrum of [Ru(η <sup>2</sup> -OAc)(NC-tpy)(dppb)] ( <b>1</b> )                                   | Pag. S6  |
| <b>Figure S3.</b> <sup>13</sup> C{ <sup>1</sup> H} DEPTQ NMR spectrum of [Ru(η <sup>2</sup> -OAc)(NC-tpy)(dppb)] ( <b>1</b> )           | Pag. S7  |
| <b>Figure S4.</b> <sup>1</sup> H- <sup>1</sup> H COSY 2D NMR spectrum of [Ru(η <sup>2</sup> -OAc)(NC-tpy)(dppb)] ( <b>1</b> )           | Pag. S8  |
| <b>Figure S5.</b> <sup>1</sup> H- <sup>13</sup> C HSQC 2D NMR spectrum of [Ru(η <sup>2</sup> -OAc)(NC-tpy)(dppb)] ( <b>1</b> )          | Pag. S9  |
| <b>Figure S6.</b> <sup>1</sup> H- <sup>13</sup> C HMBC 2D NMR spectrum of [Ru(η <sup>2</sup> -OAc)(NC-tpy)(dppb)] ( <b>1</b> )          | Pag. S10 |
| <b>Figure S7.</b> <sup>1</sup> H- <sup>31</sup> P HMBC 2D NMR spectrum of [Ru(η <sup>2</sup> -OAc)(NC-tpy)(dppb)] ( <b>1</b> )          | Pag. S11 |
| <b>Figure S8.</b> <sup>1</sup> H- <sup>1</sup> H NOESY 2D NMR spectrum of [Ru(η <sup>2</sup> -OAc)(NC-tpy)(dppb)] ( <b>1</b> )          | Pag. S12 |
| <b>Figure S9.</b> <sup>31</sup> P{ <sup>1</sup> H} NMR spectrum of [Ru(η <sup>2</sup> -OAc) <sub>2</sub> ((R,R)-Skewphos)] ( <b>2</b> ) | Pag. S13 |
| <b>Figure S10.</b> <sup>1</sup> H NMR spectrum of [Ru(η <sup>2</sup> -OAc) <sub>2</sub> ((R,R)-Skewphos)] ( <b>2</b> )                  | Pag. S14 |

- Figure S11.**  $^{13}\text{C}\{^1\text{H}\}$  DEPTQ NMR spectrum of  $[\text{Ru}(\eta^2\text{-OAc})_2((R,R)\text{-Skewphos})]$  (**2**) Pag. S15
- Figure S12.**  $^1\text{H}\text{-}^1\text{H}$  COSY 2D NMR spectrum of  $[\text{Ru}(\eta^2\text{-OAc})_2((R,R)\text{-Skewphos})]$  (**2**) Pag. S16
- Figure S13.**  $^1\text{H}\text{-}^{13}\text{C}$  HSQC 2D NMR spectrum of  $[\text{Ru}(\eta^2\text{-OAc})_2((R,R)\text{-Skewphos})]$  (**2**) Pag. S17
- Figure S14.**  $^1\text{H}\text{-}^{31}\text{P}$  HMBC 2D NMR spectrum of  $[\text{Ru}(\eta^2\text{-OAc})_2((R,R)\text{-Skewphos})]$  (**2**) Pag. S18
- Figure S15.**  $^1\text{H}\text{-}^1\text{H}$  NOESY 2D NMR spectrum of  $[\text{Ru}(\eta^2\text{-OAc})_2((R,R)\text{-Skewphos})]$  (**2**) Pag. S19
- Figure S16.**  $^{31}\text{P}\{^1\text{H}\}$  NMR spectrum of  $[\text{Ru}(\eta^2\text{-OAc})(\text{NC-tpy})((R,R)\text{-Skewphos})]$  (**4**) Pag. S20
- Figure S17.**  $^1\text{H}$  NMR spectrum of  $[\text{Ru}(\eta^2\text{-OAc})(\text{NC-tpy})((R,R)\text{-Skewphos})]$  (**4**) Pag. S21
- Figure S18.**  $^{13}\text{C}\{^1\text{H}\}$  DEPTQ NMR spectrum of  $[\text{Ru}(\eta^2\text{-OAc})(\text{NC-tpy})((R,R)\text{-Skewphos})]$  (**4**)  
Pag. S22
- Figure S19.**  $^1\text{H}\text{-}^1\text{H}$  COSY 2D NMR spectrum of  $[\text{Ru}(\eta^2\text{-OAc})(\text{NC-tpy})((R,R)\text{-Skewphos})]$  (**4**)  
Pag. S23
- Figure S20.**  $^1\text{H}\text{-}^{13}\text{C}$  HSQC 2D NMR spectrum of  $[\text{Ru}(\eta^2\text{-OAc})(\text{NC-tpy})((R,R)\text{-Skewphos})]$  (**4**)  
Pag. S24
- Figure S21.**  $^1\text{H}\text{-}^{13}\text{C}$  HMBC 2D NMR spectrum of  $[\text{Ru}(\eta^2\text{-OAc})(\text{NC-tpy})((R,R)\text{-Skewphos})]$  (**4**)  
Pag. S25
- Figure S22.**  $^1\text{H}\text{-}^{31}\text{P}$  HMBC 2D NMR spectrum of  $[\text{Ru}(\eta^2\text{-OAc})(\text{NC-tpy})((R,R)\text{-Skewphos})]$  (**4**)  
Pag. S26
- Figure S23.**  $^1\text{H}\text{-}^1\text{H}$  NOESY 2D NMR spectrum of  $[\text{Ru}(\eta^2\text{-OAc})(\text{NC-tpy})((R,R)\text{-Skewphos})]$  (**4**)  
Pag. S27
- Figure S24.**  $^{31}\text{P}\{^1\text{H}\}$  NMR spectrum of  $[\text{Ru}(\eta^1\text{-OAc})(\text{NNN-tpy})((R,R)\text{-Skewphos})]\text{OAc}$  (**6**)  
Pag. S28
- Figure S25.**  $^1\text{H}$  NMR spectrum of  $[\text{Ru}(\eta^1\text{-OAc})(\text{NNN-tpy})((R,R)\text{-Skewphos})]\text{OAc}$  (**6**)  
Pag. S29
- Figure S26.**  $^{13}\text{C}\{^1\text{H}\}$  DEPTQ NMR spectrum of  $[\text{Ru}(\eta^1\text{-OAc})(\text{NNN-tpy})((R,R)\text{-Skewphos})]\text{OAc}$  (**6**)  
Pag. S30
- Figure S27.**  $^1\text{H}\text{-}^1\text{H}$  COSY 2D NMR spectrum of  $[\text{Ru}(\eta^1\text{-OAc})(\text{NNN-tpy})((R,R)\text{-Skewphos})]\text{OAc}$  (**6**)

**Figure S28.**  $^1\text{H}$ - $^{13}\text{C}$  HSQC 2D NMR spectrum of  $[\text{Ru}(\eta^1\text{-OAc})(\text{NNN-tpy})((R,R)\text{-Skewphos})]\text{OAc}$  (**6**)

Pag. S32

**Figure S29.**  $^1\text{H}$ - $^{13}\text{C}$  HMBC 2D NMR spectrum of  $[\text{Ru}(\eta^1\text{-OAc})(\text{NNN-tpy})((R,R)\text{-Skewphos})]\text{OAc}$  (**6**)

Pag. S33

**Figure S30.**  $^1\text{H}$ - $^{31}\text{P}$  HMBC 2D NMR spectrum of  $[\text{Ru}(\eta^1\text{-OAc})(\text{NNN-tpy})((R,R)\text{-Skewphos})]\text{OAc}$  (**6**)

Pag. S34

**Figure S31.**  $^1\text{H}$ - $^1\text{H}$  NOESY 2D NMR spectrum of  $[\text{Ru}(\eta^1\text{-OAc})(\text{NNN-tpy})((R,R)\text{-Skewphos})]\text{OAc}$  (**6**)

Pag. S35

**Figure S32.** Evidence of the formation of the  $[\text{Ru}(\text{OAc})_2((S,S)\text{-Skewphos})(\text{PPh}_3)]$  intermediate in the reaction of  $(S,S)\text{-Skewphos}$  with  $[\text{Ru}(\eta^2\text{-OAc})_2(\text{PPh}_3)_2]$  in methanol at reflux in the  $^{31}\text{P}\{^1\text{H}\}$  NMR spectrum

Pag. S36

**Figure S33.** Conversion of complex  $[\text{Ru}(\eta^2\text{-OAc})(\text{NC-tpy})((S,S)\text{-Skewphos})]$  (**5**) to the cationic specie  $[\text{Ru}(\eta^1\text{-OAc})(\text{NNN-tpy})((S,S)\text{-Skewphos})]\text{OAc}$  (**7**) promoted by light with acetic acid in the  $^{31}\text{P}\{^1\text{H}\}$  NMR spectra in  $\text{CD}_3\text{OD}$

Pag. S37

**Figure S34.** GC-FID chromatogram of the reaction mixture of the enantioselective photocatalytic TH of acetophenone promoted by complex **7** at S/C 1000

Pag. S38

**Figure S35.** Comparison between the GC-FID chromatograms of the enantioselective photocatalytic TH of acetophenone promoted by complex **6** (A) and **7** (B) at S/C 1000

Pag. S39

**Figure S36.**  $^{31}\text{P}\{^1\text{H}\}$  NMR spectrum of  $[\text{Ru}(\text{OiPr})(\text{NNN-tpy})((S,S)\text{-Skewphos})](\text{OiPr})$  (**A**) in 2-propanol- $d^8$  obtained after visible light irradiation from complex **7**

Pag. S40

**Figure S37.**  $^1\text{H}$  NMR spectrum with evidences of the formation of  $[\text{RuH}(\text{NNN-tpy})((S,S)\text{-Skewphos})](\text{OiPr})$  (**B**) in 2-propanol/toluene- $d^8$

Pag. S41

**Figure S38.** Effect of complexes **1** and **4** on ATC cell viability in SW1736, 8505C and Nthy-ori 3-1 cells

Pag. S42

**Figure S39.** Effect of complexes **5** and **6** on ATC cell viability in SW1736, 8505C and Nthy-ori 3-1

|                                                                                                                                                              |          |
|--------------------------------------------------------------------------------------------------------------------------------------------------------------|----------|
| cells                                                                                                                                                        | Pag. S43 |
| <b>Figure S40.</b> Effect of complexes <b>7</b> and [RuCl(NNN-tpy)(( <i>R,R</i> )-Skewphos)]Cl on ATC cell viability in SW1736, 8505C and Nthy-ori 3-1 cells | Pag. S44 |
| <b>Figure S41.</b> Effect of complex [RuCl(NNN-tpy)(( <i>S,S</i> )-Skewphos)]PF <sub>6</sub> on ATC cell viability in SW1736, 8505C and Nthy-ori 3-1 cells   | Pag. S45 |
| <b>Table S1.</b> Statistical analysis for tested complexes                                                                                                   | Pag. S46 |
| <b>Single crystal X-ray structure determination of Compound 1. General data.</b>                                                                             | Pag. S47 |
| <b>Figure S42.</b> Molecular structure of complex <b>1</b>                                                                                                   | Pag. S48 |
| <b>Single crystal X-ray structure determination of complex 1. Detailed crystallographic data.</b>                                                            | Pag. S49 |
| <b>References</b>                                                                                                                                            | Pag. S51 |

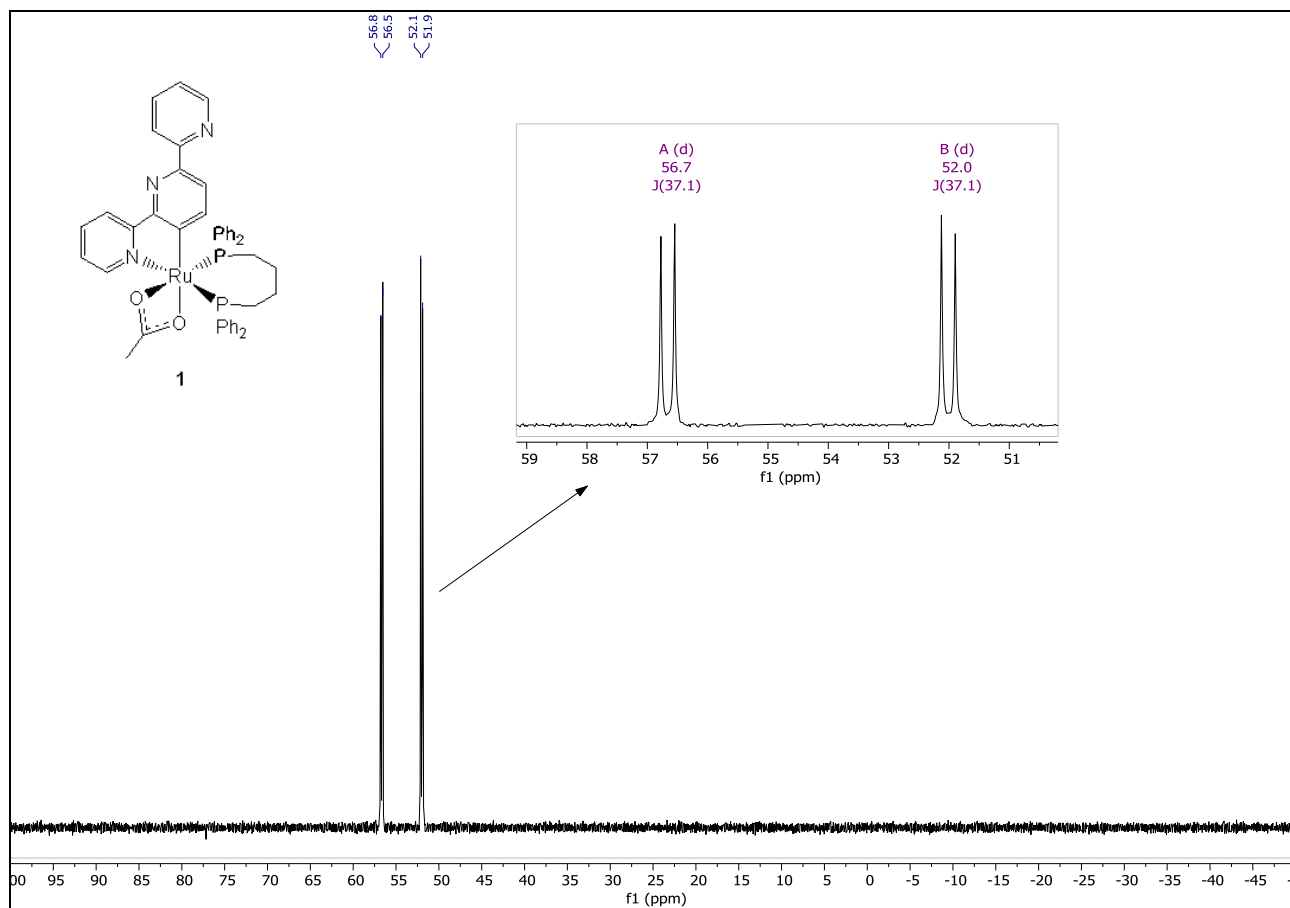

**Figure S1.**  $^{31}\text{P}\{^1\text{H}\}$  NMR spectrum (162.0 MHz) of  $[\text{Ru}(\eta^2\text{-OAc})(\text{NC-tpy})(\text{dppb})]$  (**1**) in  $\text{CD}_2\text{Cl}_2$  at 25 °C.

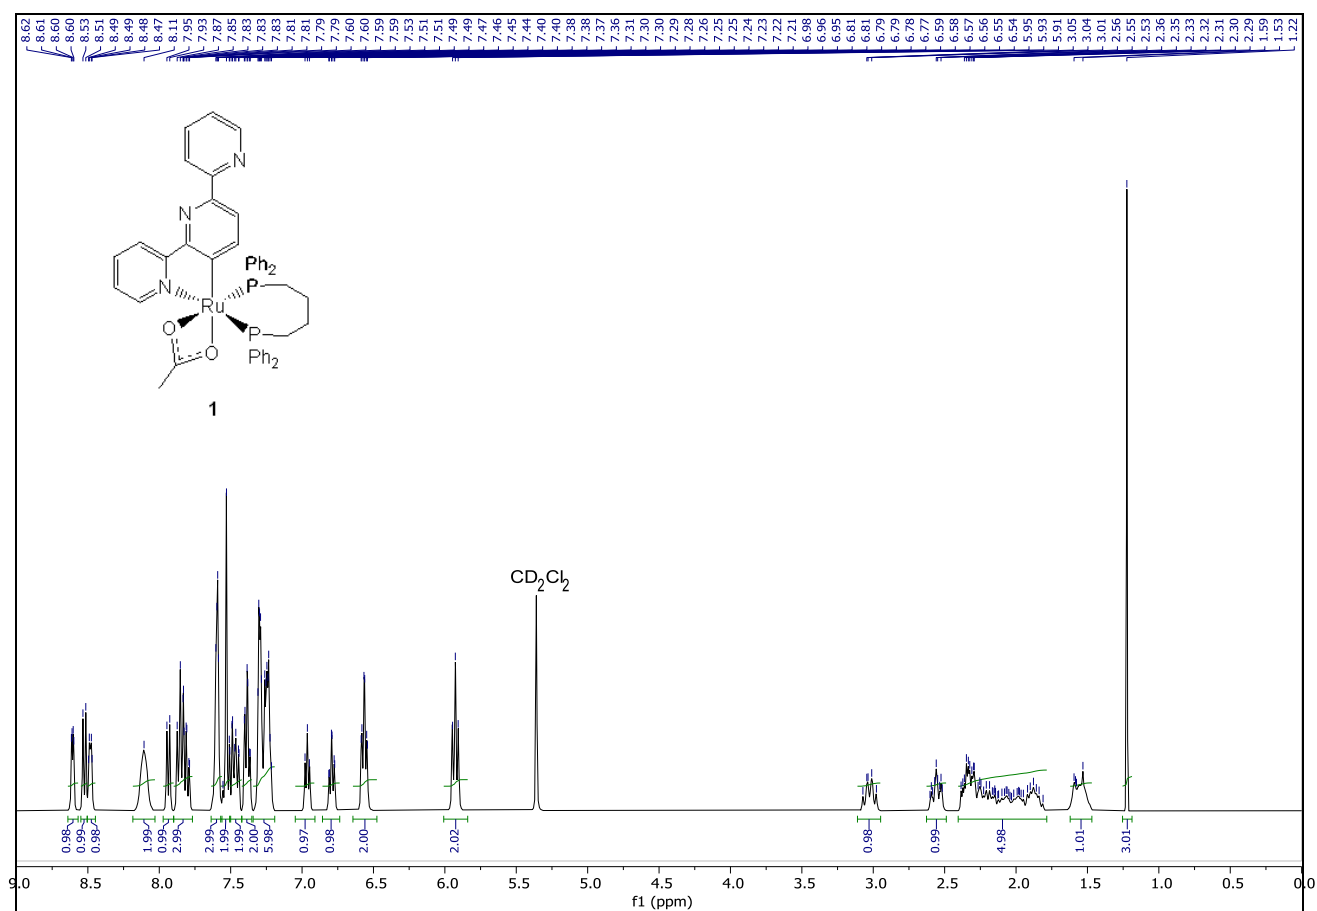

**Figure S2.**  $^1\text{H}$  NMR spectrum (400.1 MHz) of  $[\text{Ru}(\eta^2\text{-OAc})(\text{NC-tpy})(\text{dppb})]$  (1) in  $\text{CD}_2\text{Cl}_2$  at 25 °C.

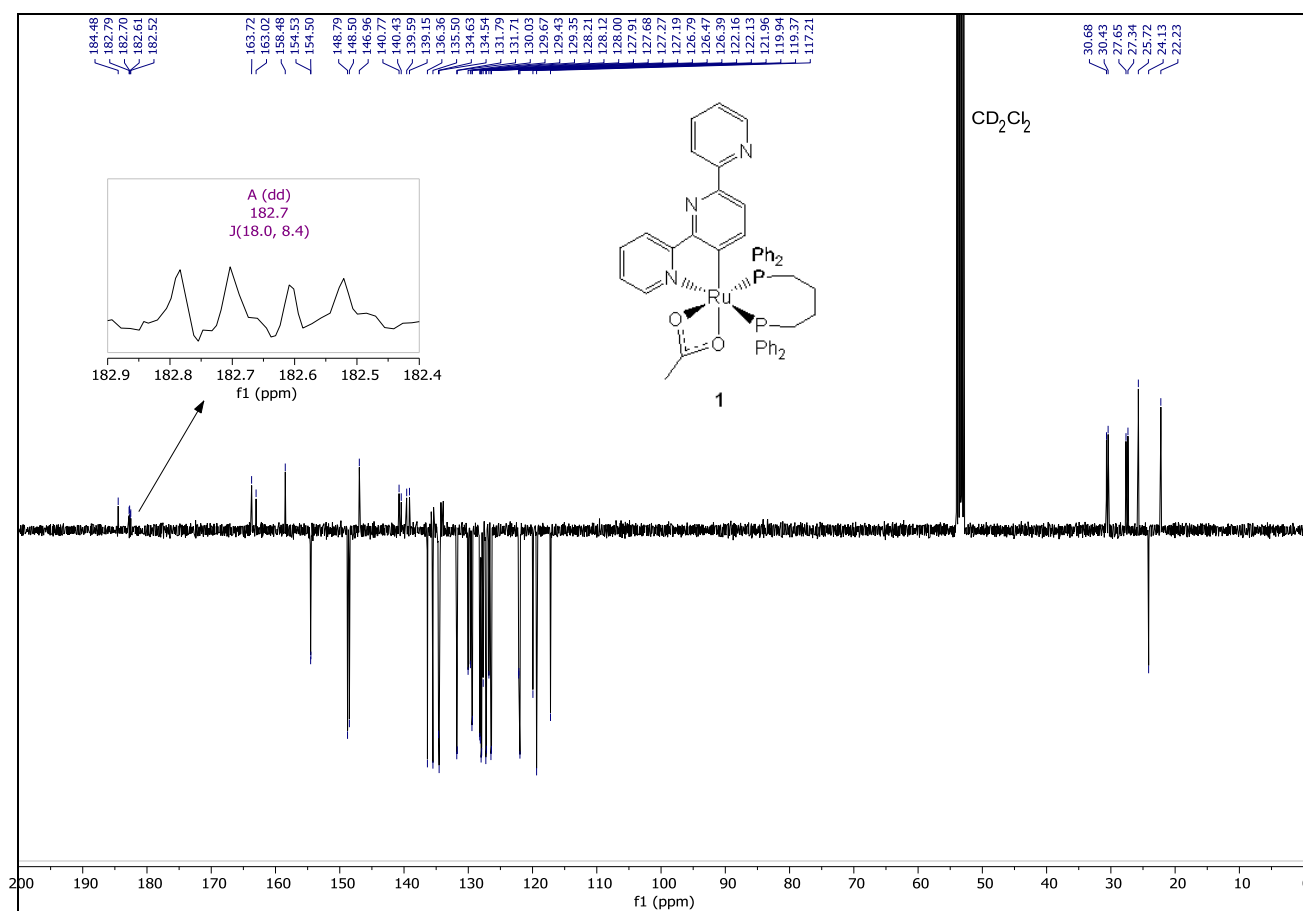

**Figure S3.**  $^{13}\text{C}\{^1\text{H}\}$  DEPTQ NMR spectrum (100.6 MHz) of  $[\text{Ru}(\eta^2\text{-OAc})(\text{NC-tpy})(\text{dppb})]$  (**1**) in  $\text{CD}_2\text{Cl}_2$  at 25 °C.

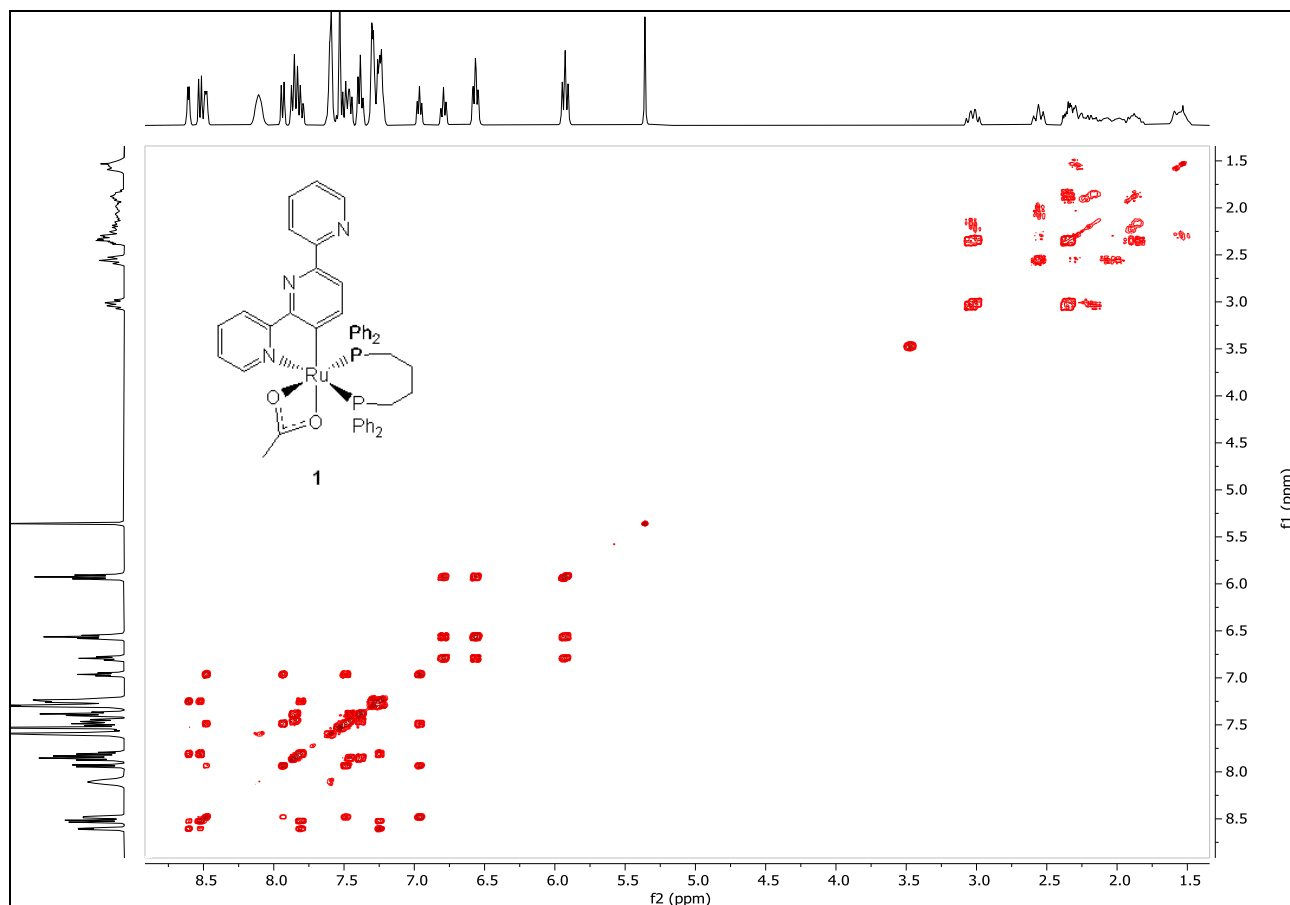

**Figure S4.**  $^1\text{H}$ - $^1\text{H}$  COSY 2D NMR spectrum of  $[\text{Ru}(\eta^2\text{-OAc})(\text{NC-tpy})(\text{dppb})]$  (**1**) in  $\text{CD}_2\text{Cl}_2$  at 25 °C.



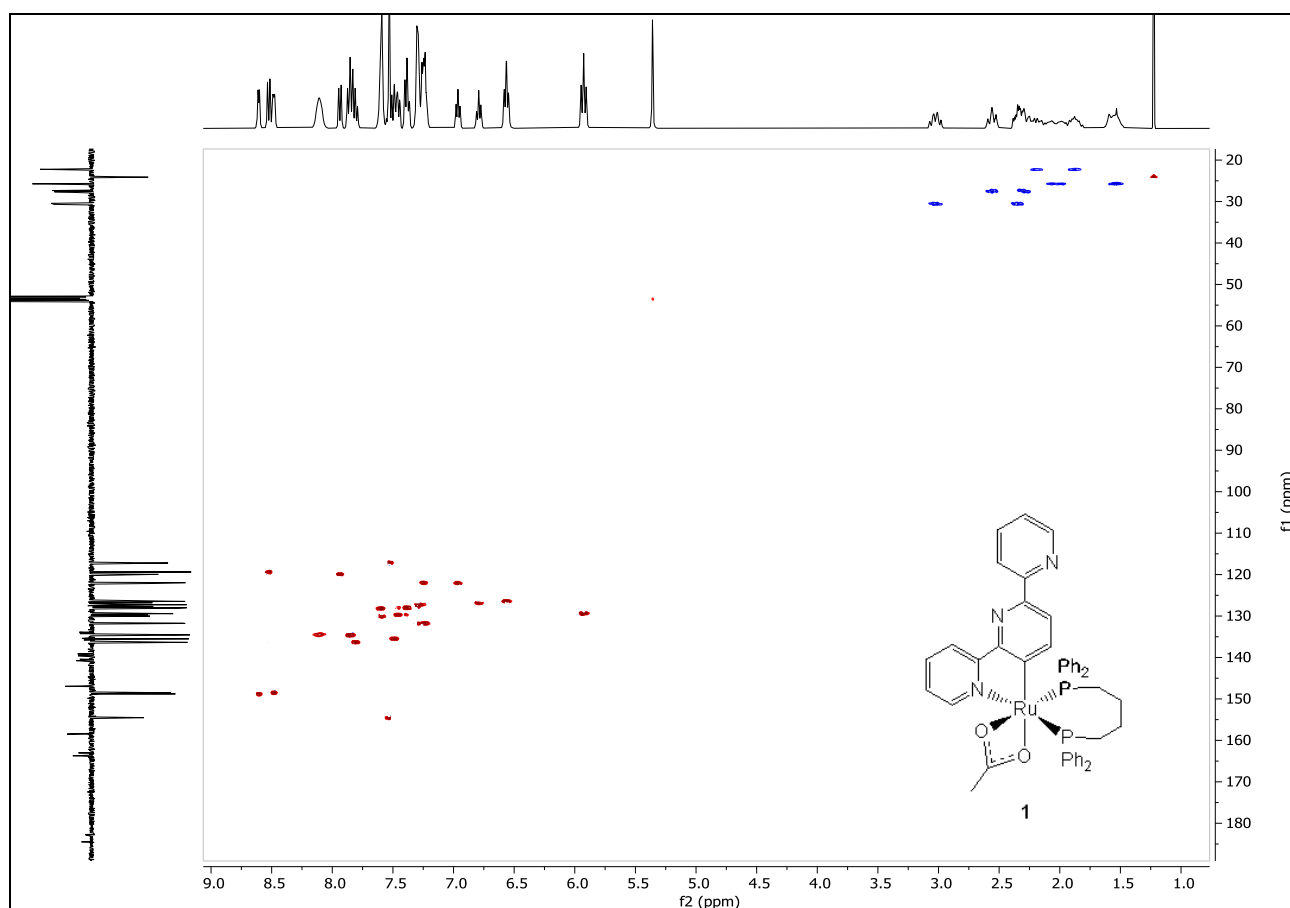

**Figure S5.**  $^1\text{H}$ - $^{13}\text{C}$  HSQC 2D NMR spectrum of  $[\text{Ru}(\eta^2\text{-OAc})(\text{NC-tpy})(\text{dppb})]$  (**1**) in  $\text{CD}_2\text{Cl}_2$  at 25  $^\circ\text{C}$ .

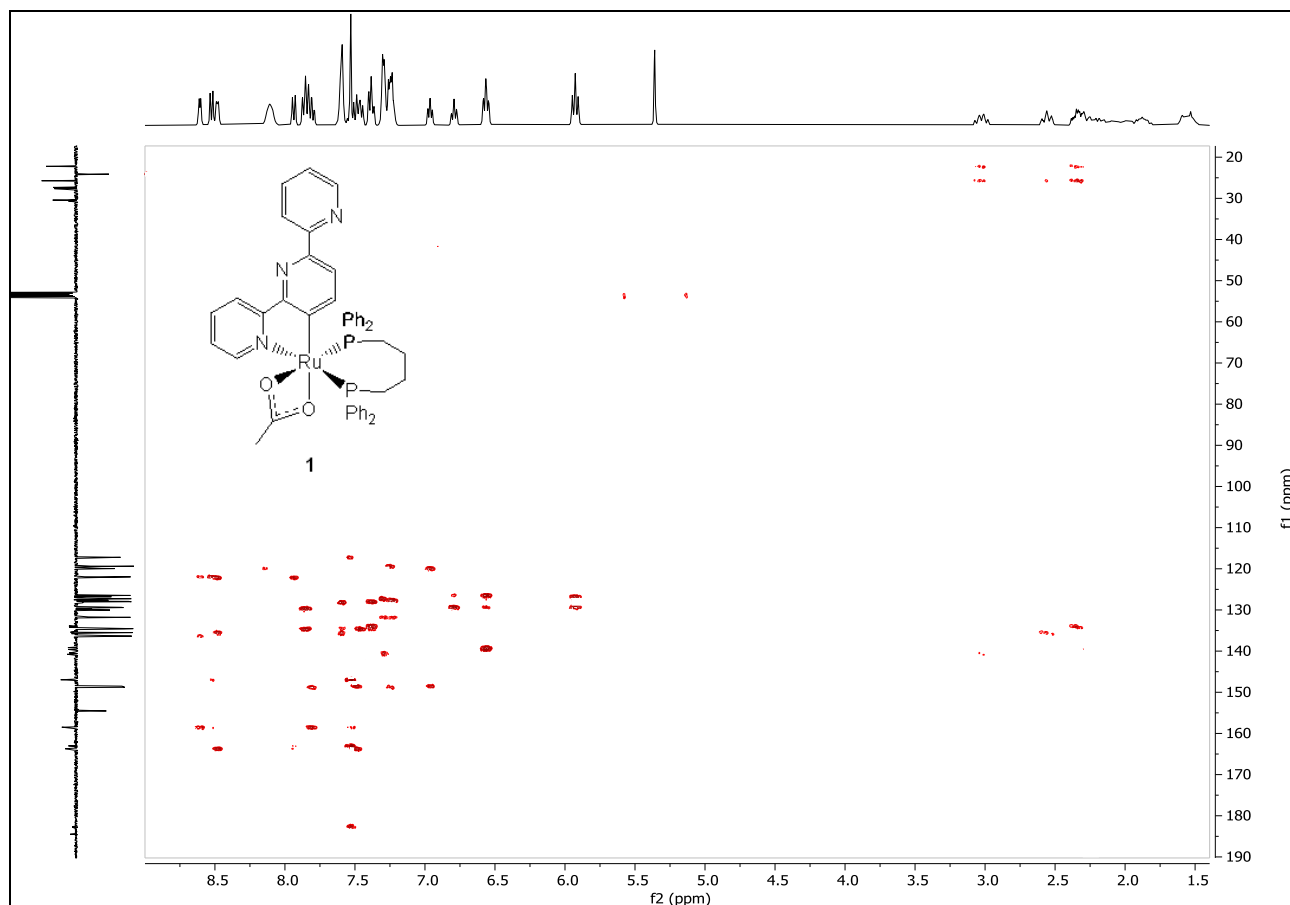

**Figure S6.**  $^1\text{H}$ - $^{13}\text{C}$  HMBC 2D NMR spectrum of  $[\text{Ru}(\eta^2\text{-OAc})(\text{NC-tpy})(\text{dppb})]$  (**1**) in  $\text{CD}_2\text{Cl}_2$  at 25 °C.

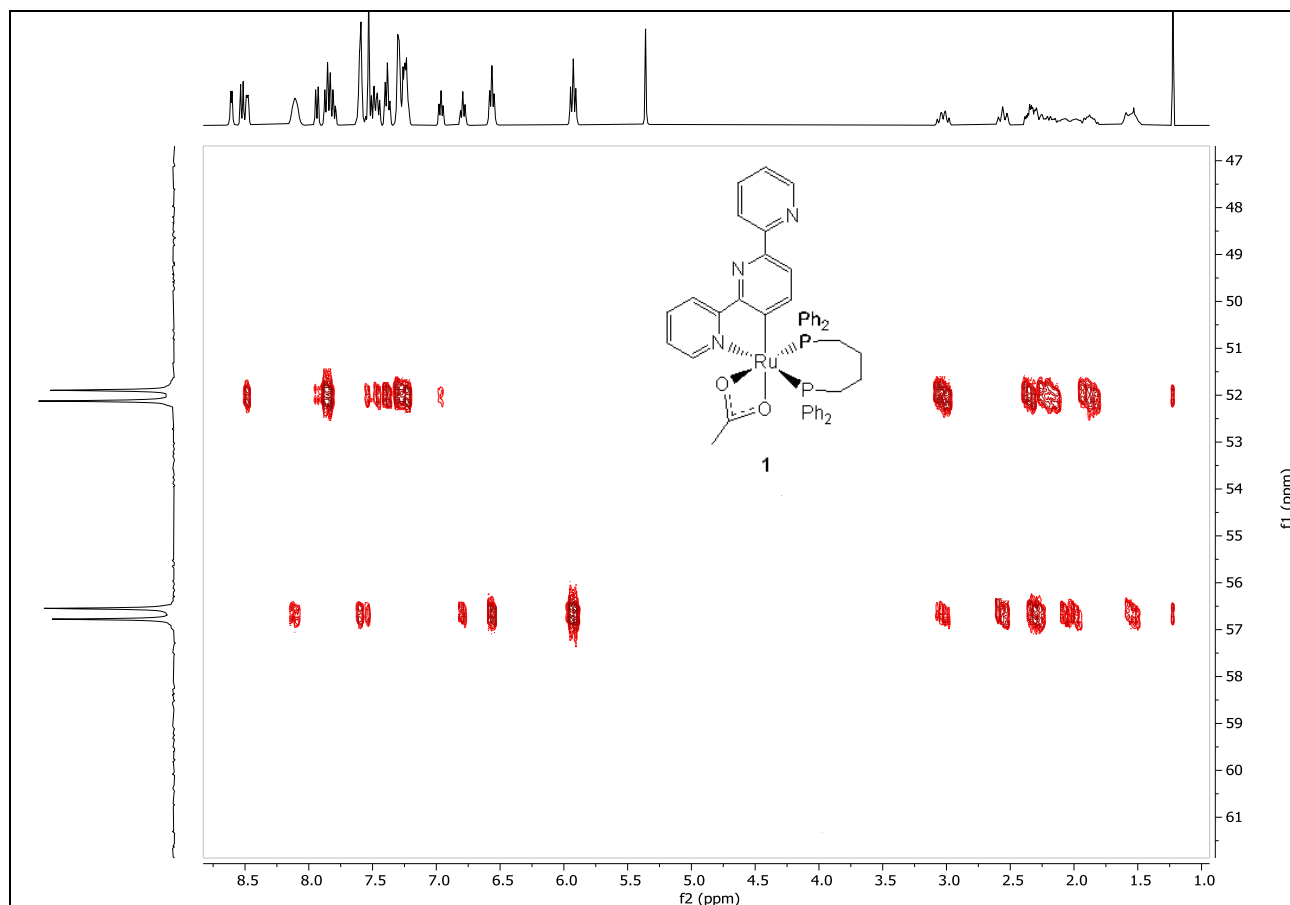

**Figure S7.**  $^1\text{H}$ - $^{31}\text{P}$  HMBC 2D NMR spectrum of  $[\text{Ru}(\eta^2\text{-OAc})(\text{NC-tpy})(\text{dppb})]$  (**1**) in  $\text{CD}_2\text{Cl}_2$  at 25 °C.

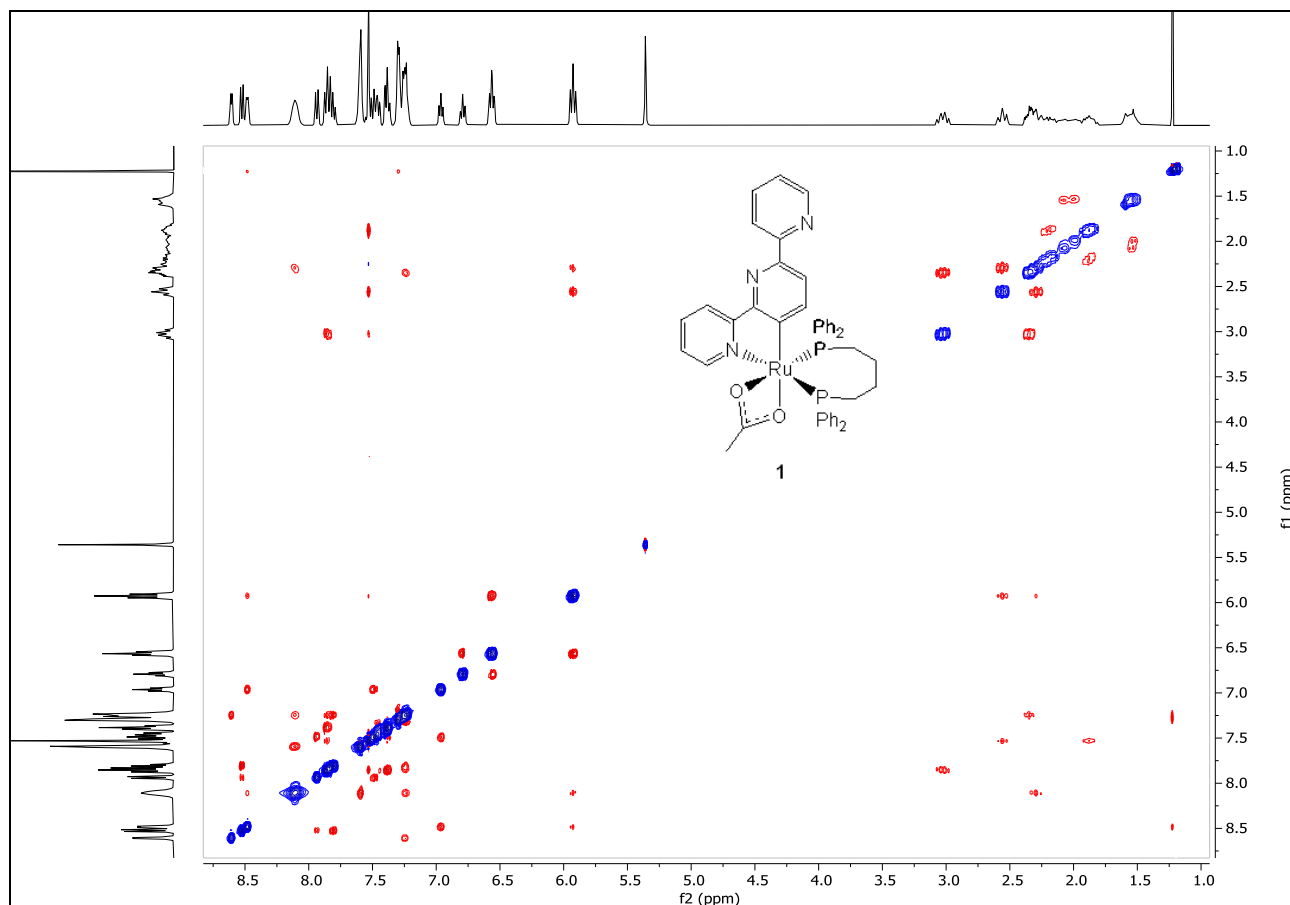

**Figure S8.** <sup>1</sup>H-<sup>1</sup>H NOESY 2D NMR spectrum of [Ru(η<sup>2</sup>-OAc)(NC-tpy)(dppb)] (**1**) in CD<sub>2</sub>Cl<sub>2</sub> at 25 °C.

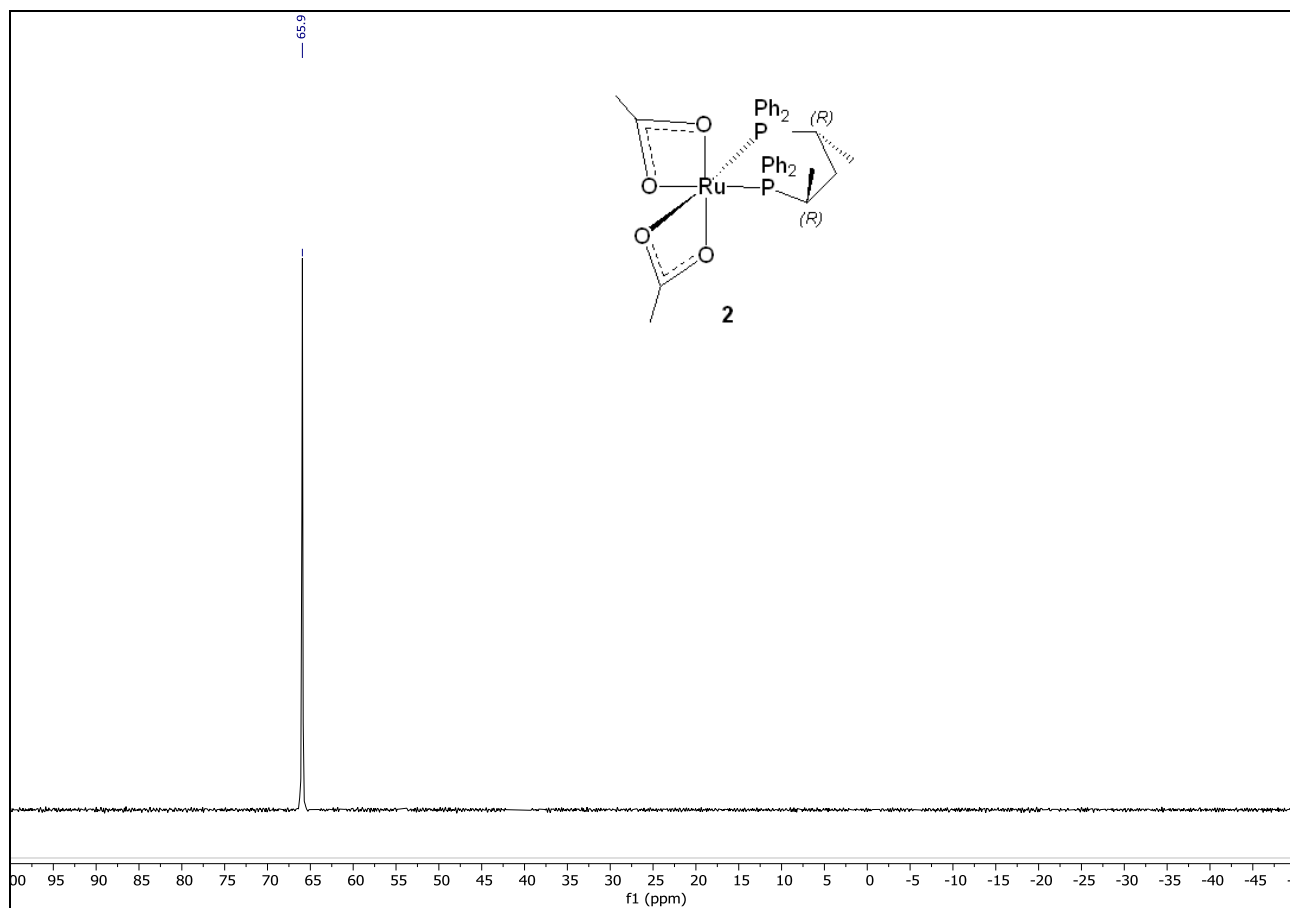

**Figure S9.**  $^{31}\text{P}\{^1\text{H}\}$  NMR spectrum (162.0 MHz) of  $[\text{Ru}(\eta^2\text{-OAc})_2((R,R)\text{-Skewphos})]$  (**2**) in  $\text{CD}_3\text{OD}$  at 25 °C.

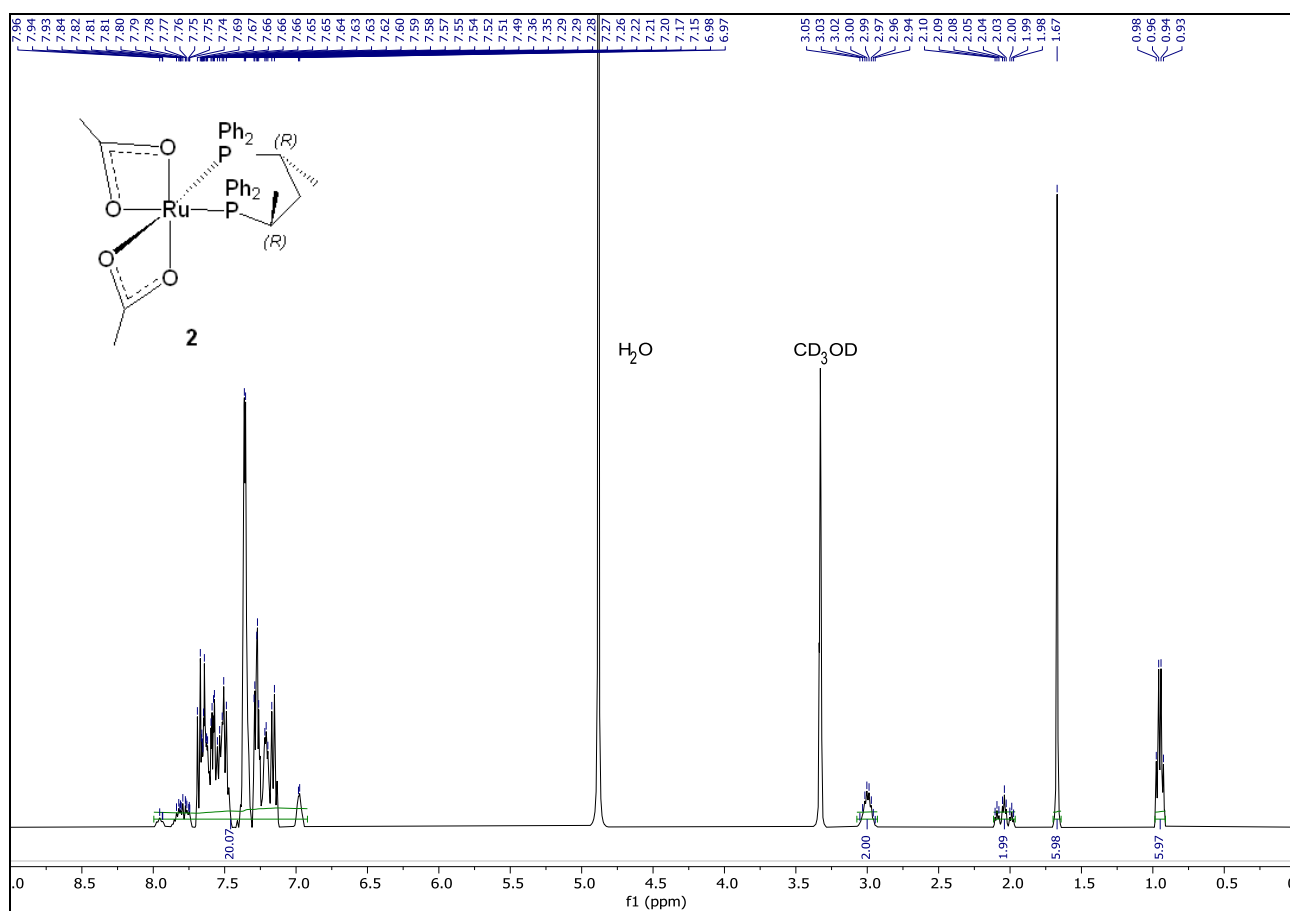

**Figure S10.**  $^1\text{H}$  NMR spectrum (400.1 MHz) of  $[\text{Ru}(\eta^2\text{-OAc})_2((R,R)\text{-Skewphos})]$  (**2**) in  $\text{CD}_3\text{OD}$  at  $25\text{ }^\circ\text{C}$ .

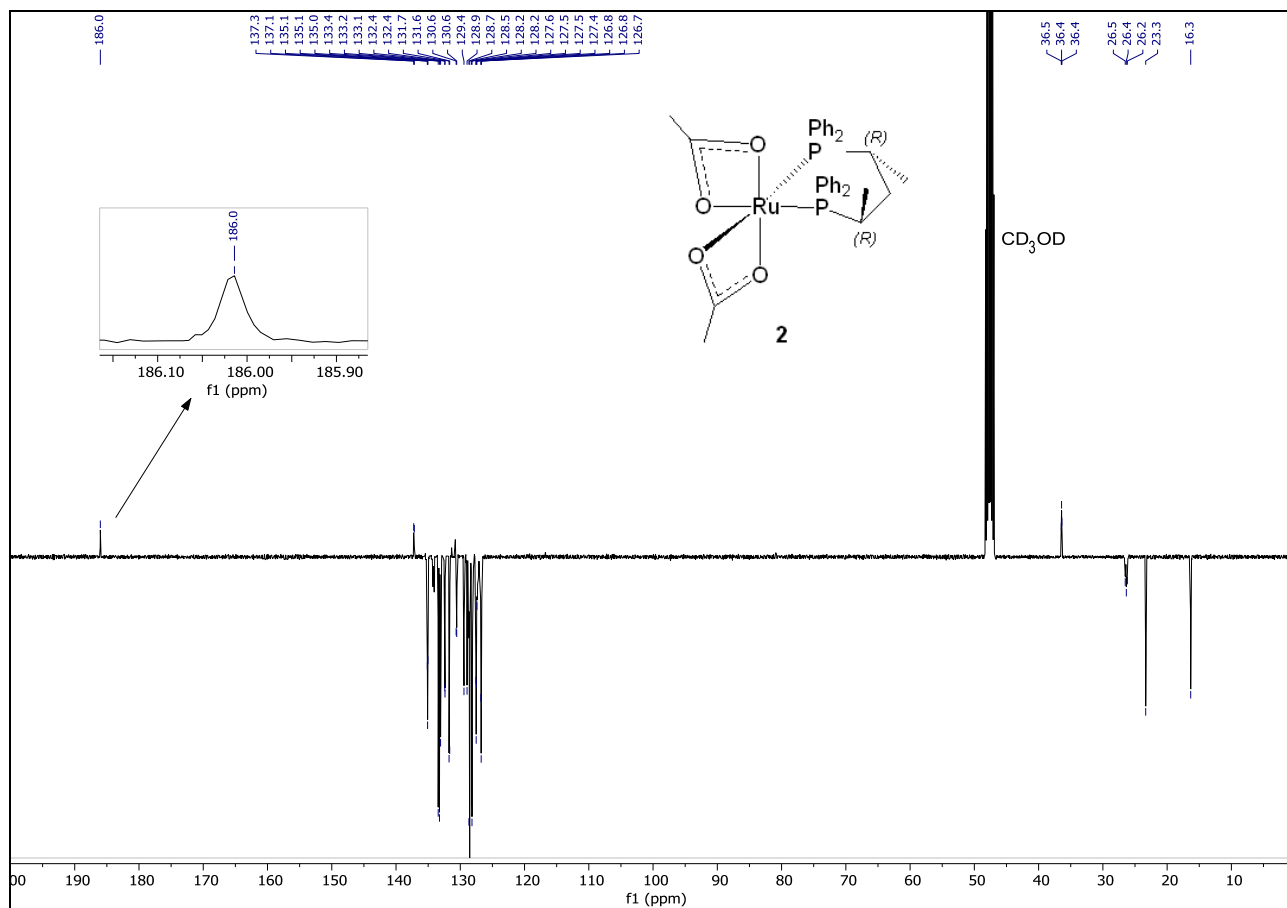

**Figure S11.**  $^{13}\text{C}\{^1\text{H}\}$  NMR spectrum (100.6 MHz) of  $[\text{Ru}(\eta^2\text{-OAc})_2((R,R)\text{-Skewphos})]$  (2) in  $\text{CD}_3\text{OD}$  at 25 °C.

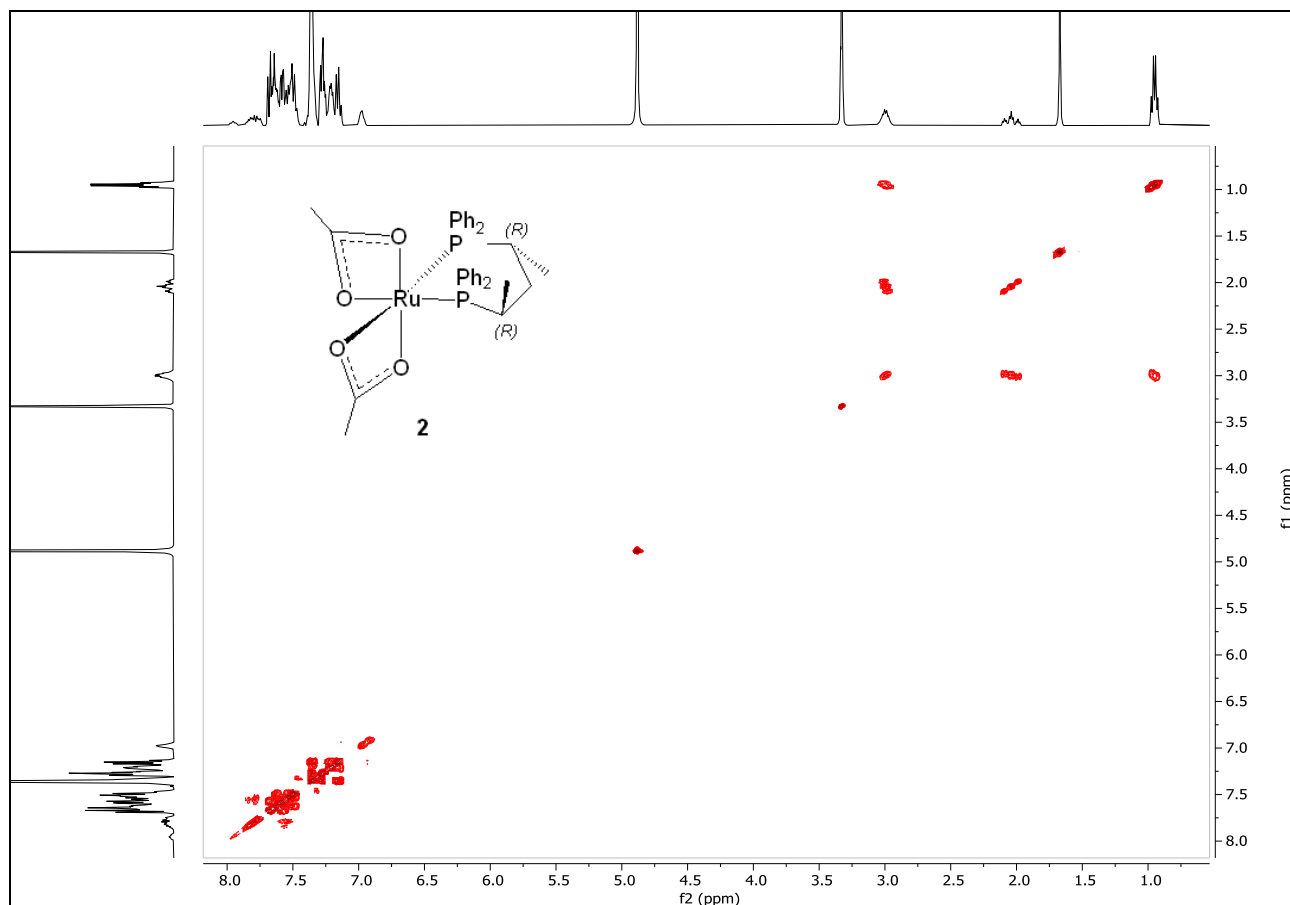

**Figure S12.**  $^1\text{H}$ - $^1\text{H}$  COSY 2D NMR spectrum of  $[\text{Ru}(\eta^2\text{-OAc})_2((R,R)\text{-Skewphos})]$  (**2**) in  $\text{CD}_3\text{OD}$  at  $25\text{ }^\circ\text{C}$ .



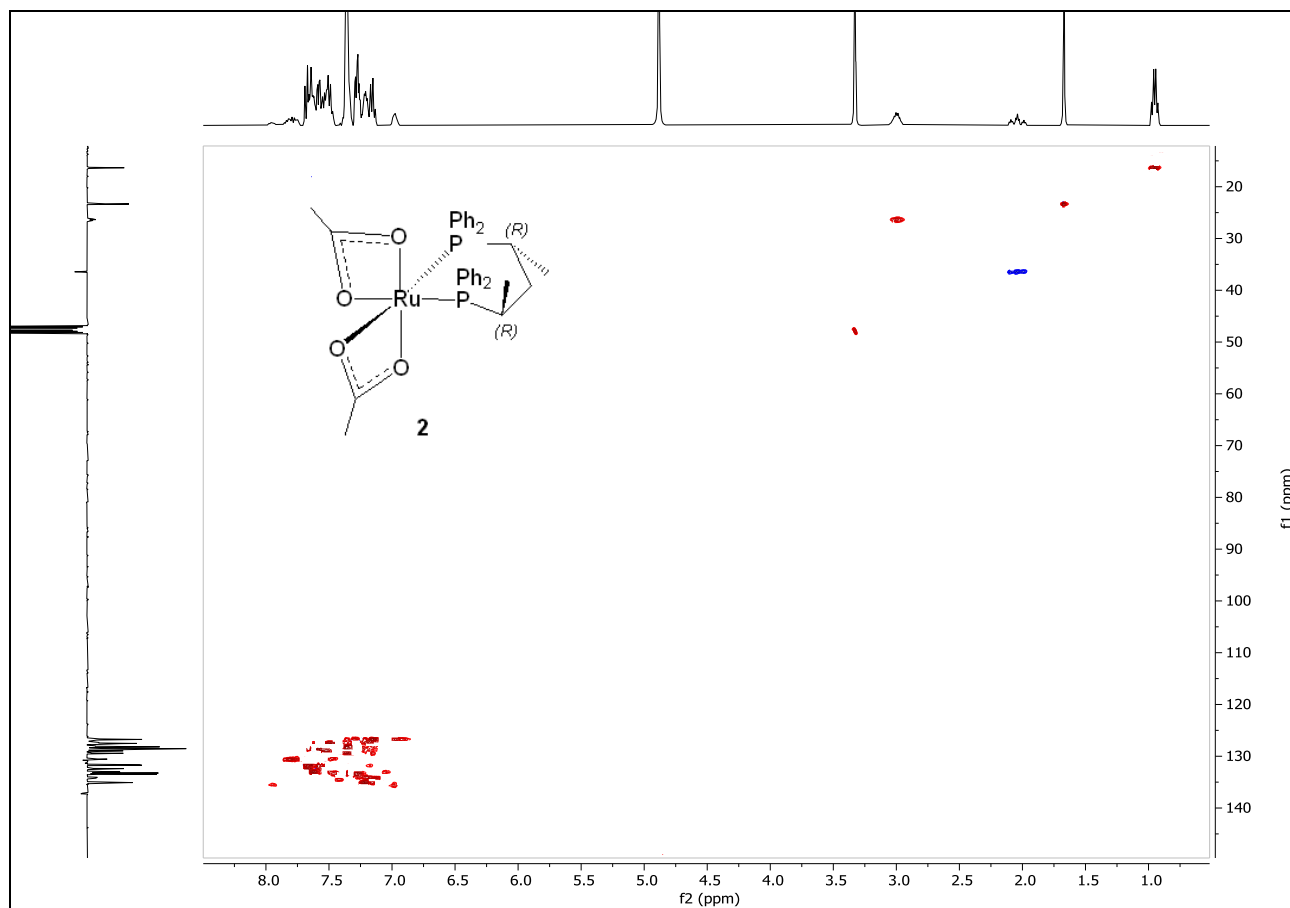

**Figure S13.**  $^1\text{H}$ - $^{13}\text{C}$  HSQC 2D NMR spectrum of  $[\text{Ru}(\eta^2\text{-OAc})_2((R,R)\text{-Skewphos})]$  (**2**) in  $\text{CD}_3\text{OD}$  at  $25\text{ }^\circ\text{C}$ .

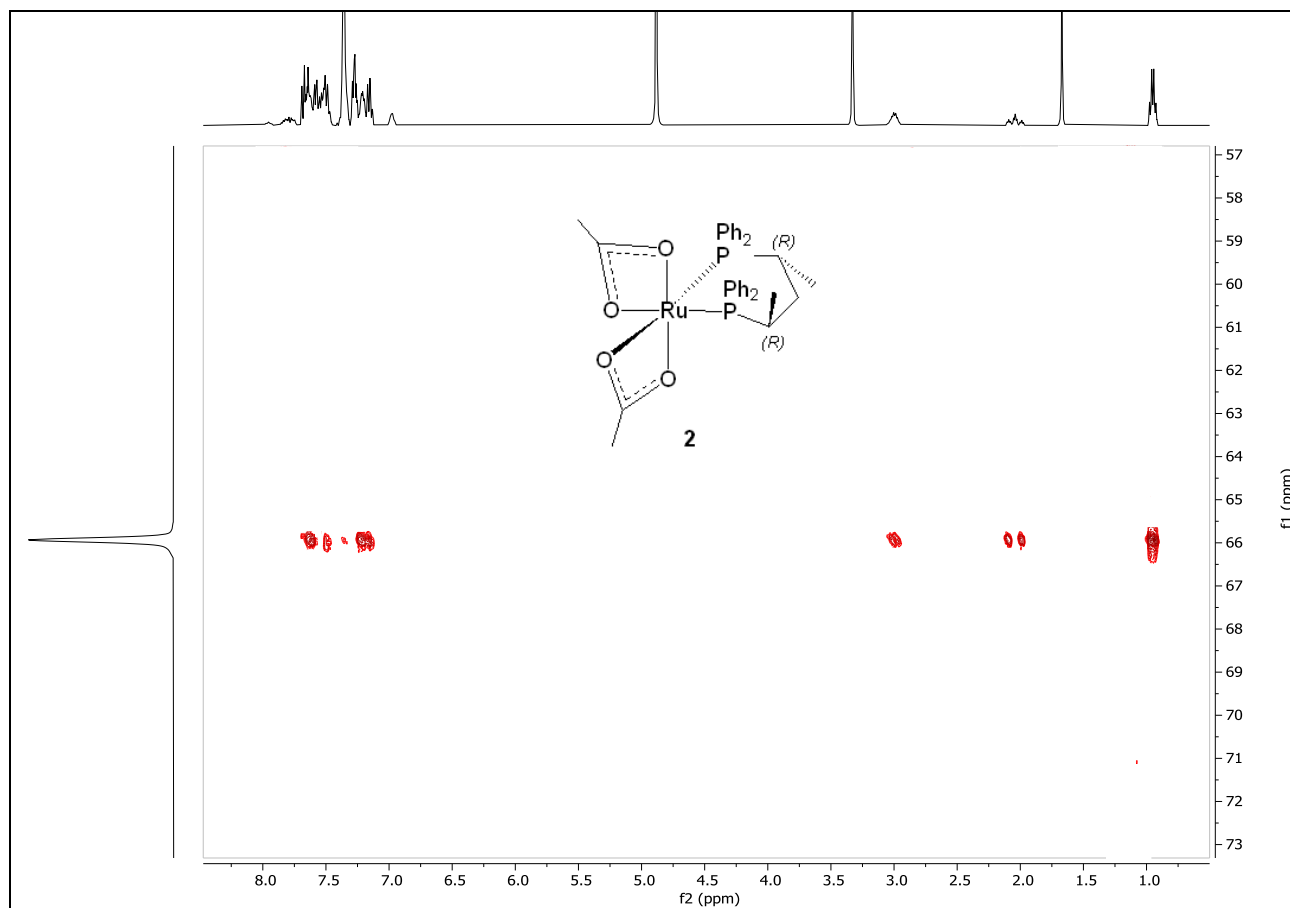

**Figure S14.**  $^1\text{H}$ - $^{31}\text{P}$  HMBC 2D NMR spectrum of  $[\text{Ru}(\eta^2\text{-OAc})_2((R,R)\text{-Skewphos})]$  (**2**) in  $\text{CD}_3\text{OD}$  at 25 °C.

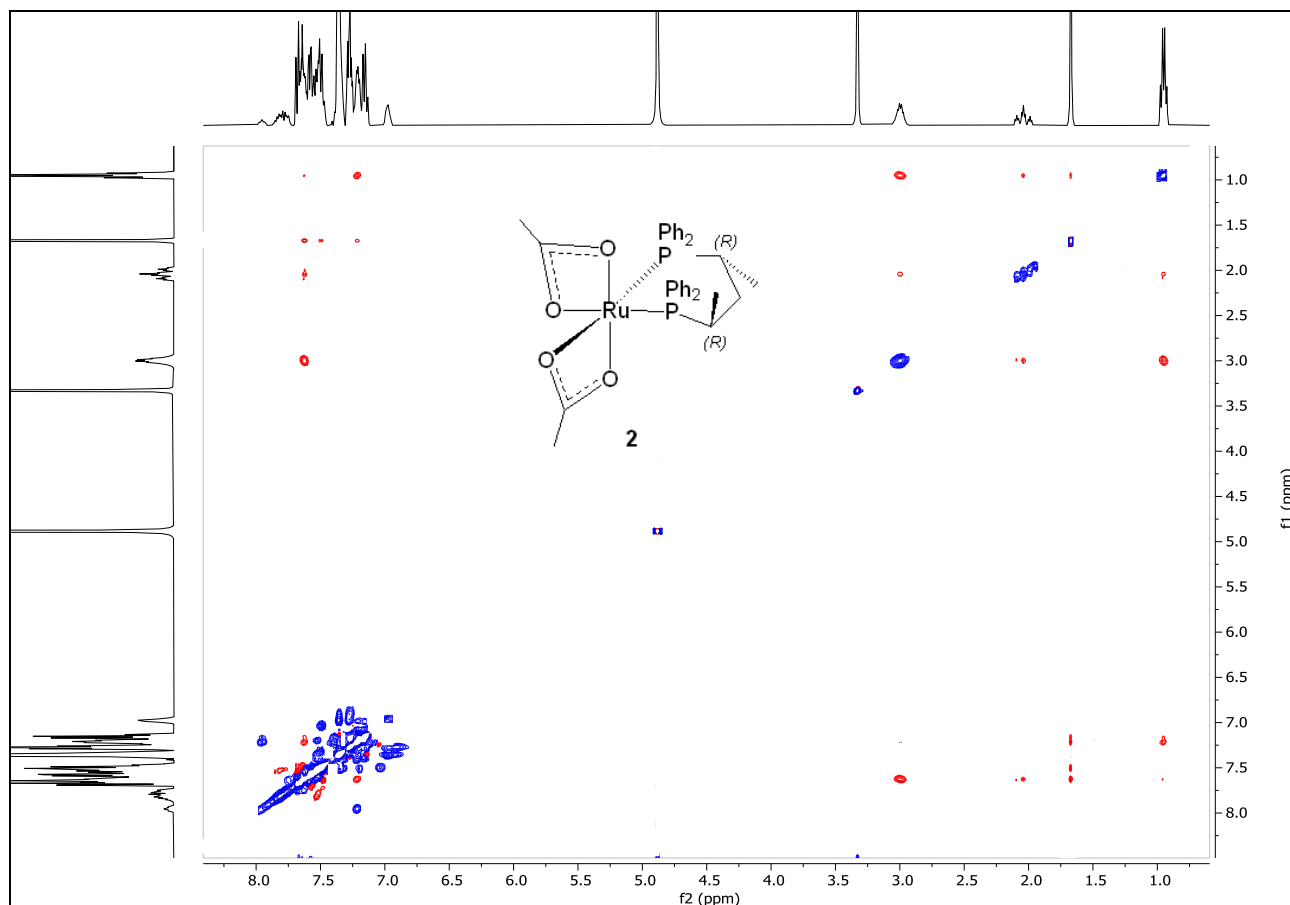

**Figure S15.** <sup>1</sup>H-<sup>1</sup>H NOESY 2D NMR spectrum of [Ru(η<sup>2</sup>-OAc)<sub>2</sub>((R,R)-Skewphos)] (**2**) in CD<sub>3</sub>OD at 25 °C.

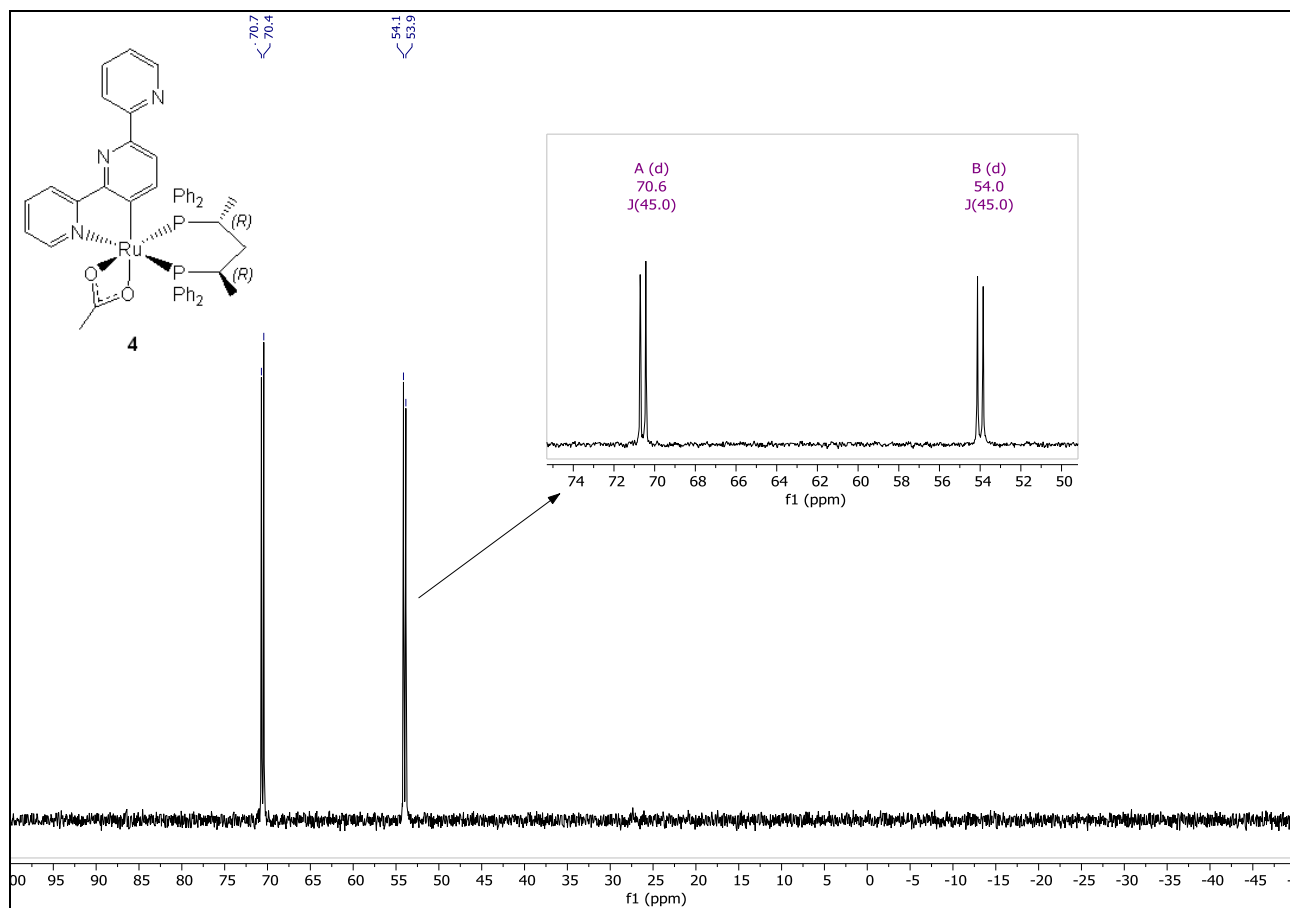

**Figure S16.**  $^{31}\text{P}\{^1\text{H}\}$  NMR spectrum (162.0 MHz) of  $[\text{Ru}(\eta^2\text{-OAc})(\text{NC-tpy})((R,R)\text{-Skewphos})]$  (**4**) in  $\text{CD}_2\text{Cl}_2$  at  $25^\circ\text{C}$ .

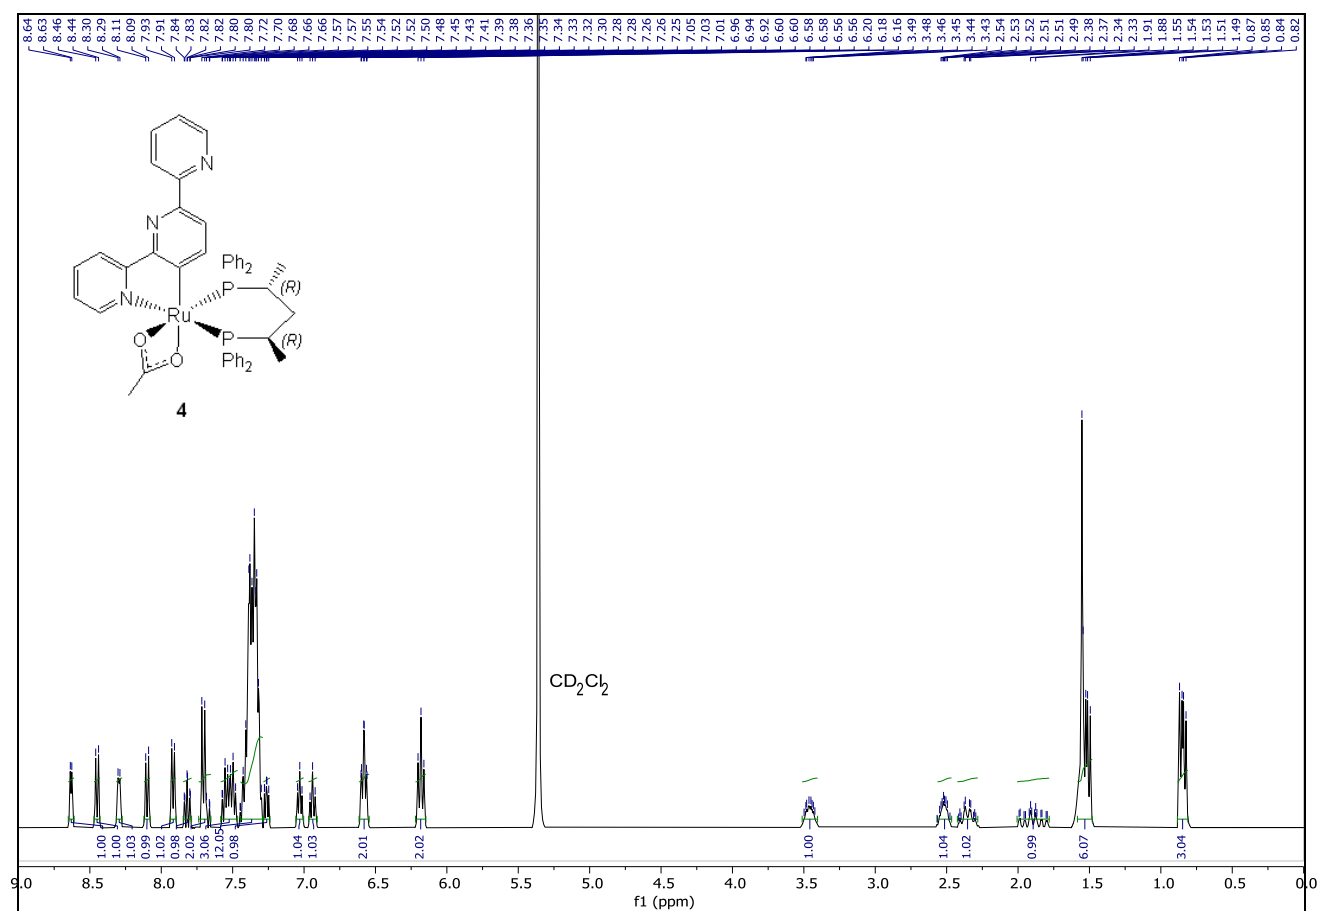

**Figure S17.**  $^1\text{H}$  NMR spectrum (400.1 MHz) of  $[\text{Ru}(\eta^2\text{-OAc})(\text{NC-tpy})((R,R)\text{-Skewphos})]$  (**4**) in  $\text{CD}_2\text{Cl}_2$  at 25 °C.

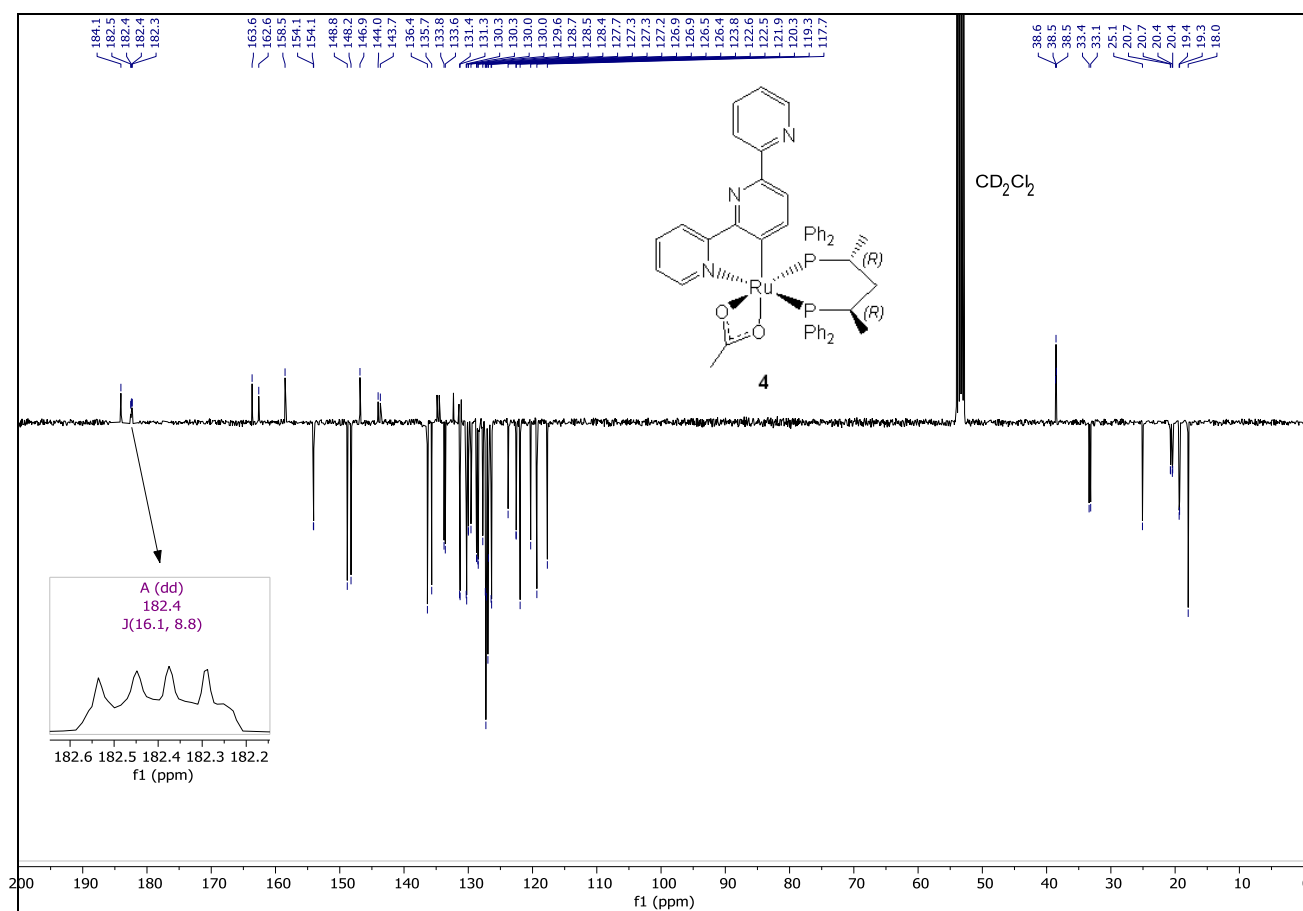

**Figure S18.**  $^{13}\text{C}\{^1\text{H}\}$  DEPTQ NMR spectrum (100.6 MHz) of  $[\text{Ru}(\eta^2\text{-OAc})(\text{NC-tpy})((R,R)\text{-Skewphos})]$  (**4**) in  $\text{CD}_2\text{Cl}_2$  at 25 °C.

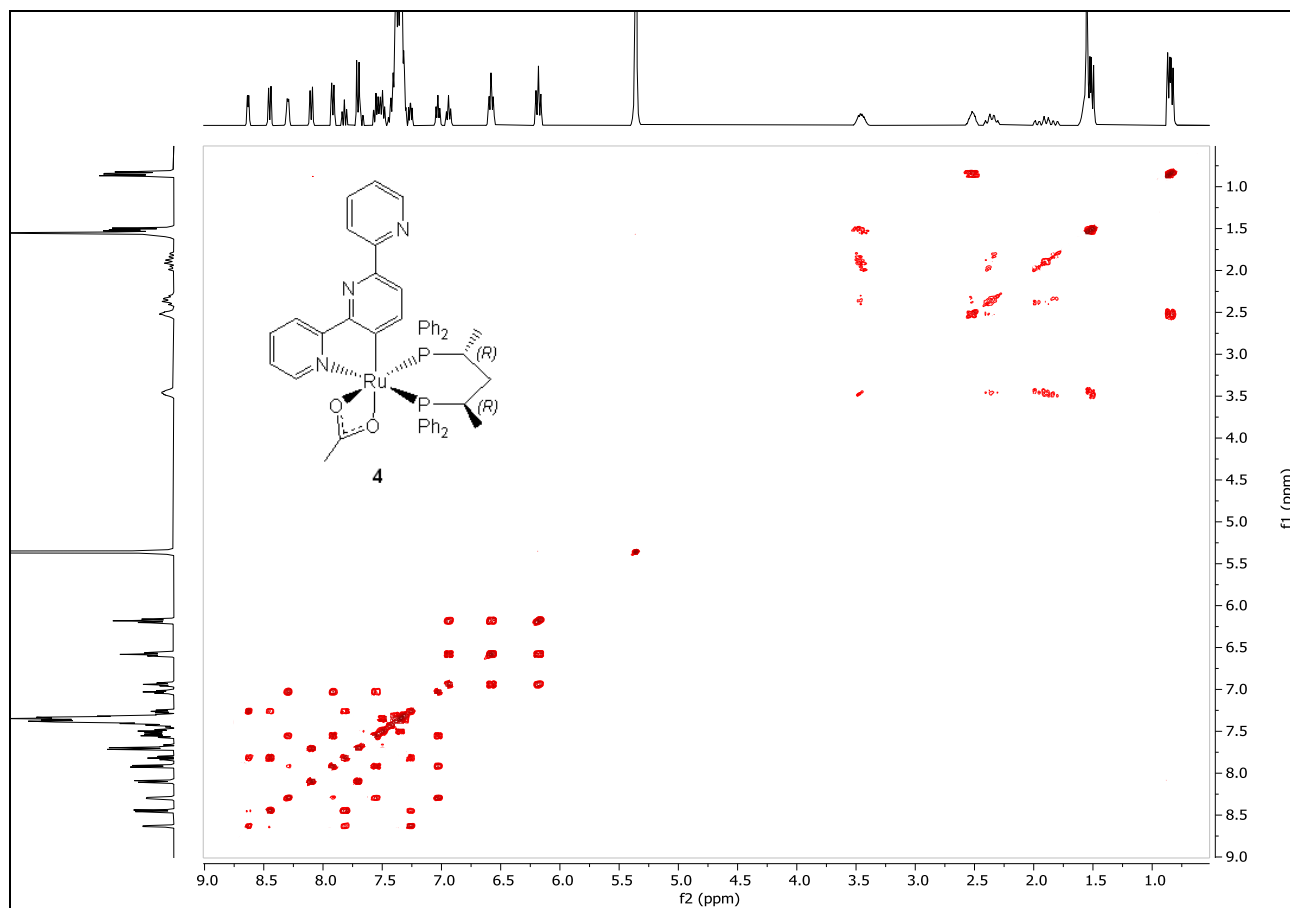

**Figure S19.**  $^1\text{H}$ - $^1\text{H}$  COSY 2D NMR spectrum of  $[\text{Ru}(\eta^2\text{-OAc})(\text{NC-tpy})((R,R)\text{-Skewphos})]$  (**4**) in  $\text{CD}_2\text{Cl}_2$  at 25 °C.

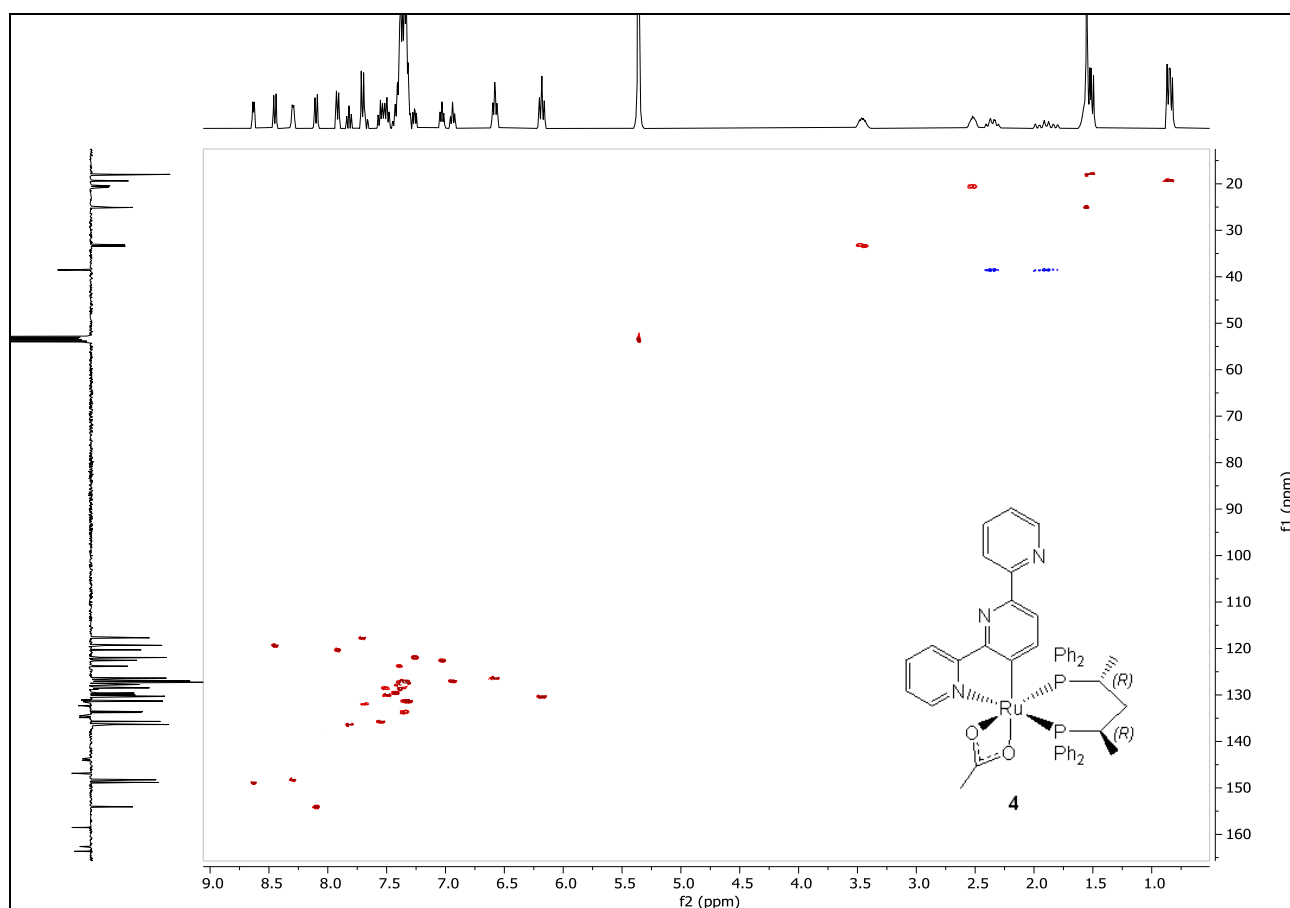

**Figure S20.**  $^1\text{H}$ - $^{13}\text{C}$  HSQC 2D NMR spectrum of  $[\text{Ru}(\eta^2\text{-OAc})(\text{NC-tpy})((R,R)\text{-Skewphos})]$  (**4**) in  $\text{CD}_2\text{Cl}_2$  at 25 °C.



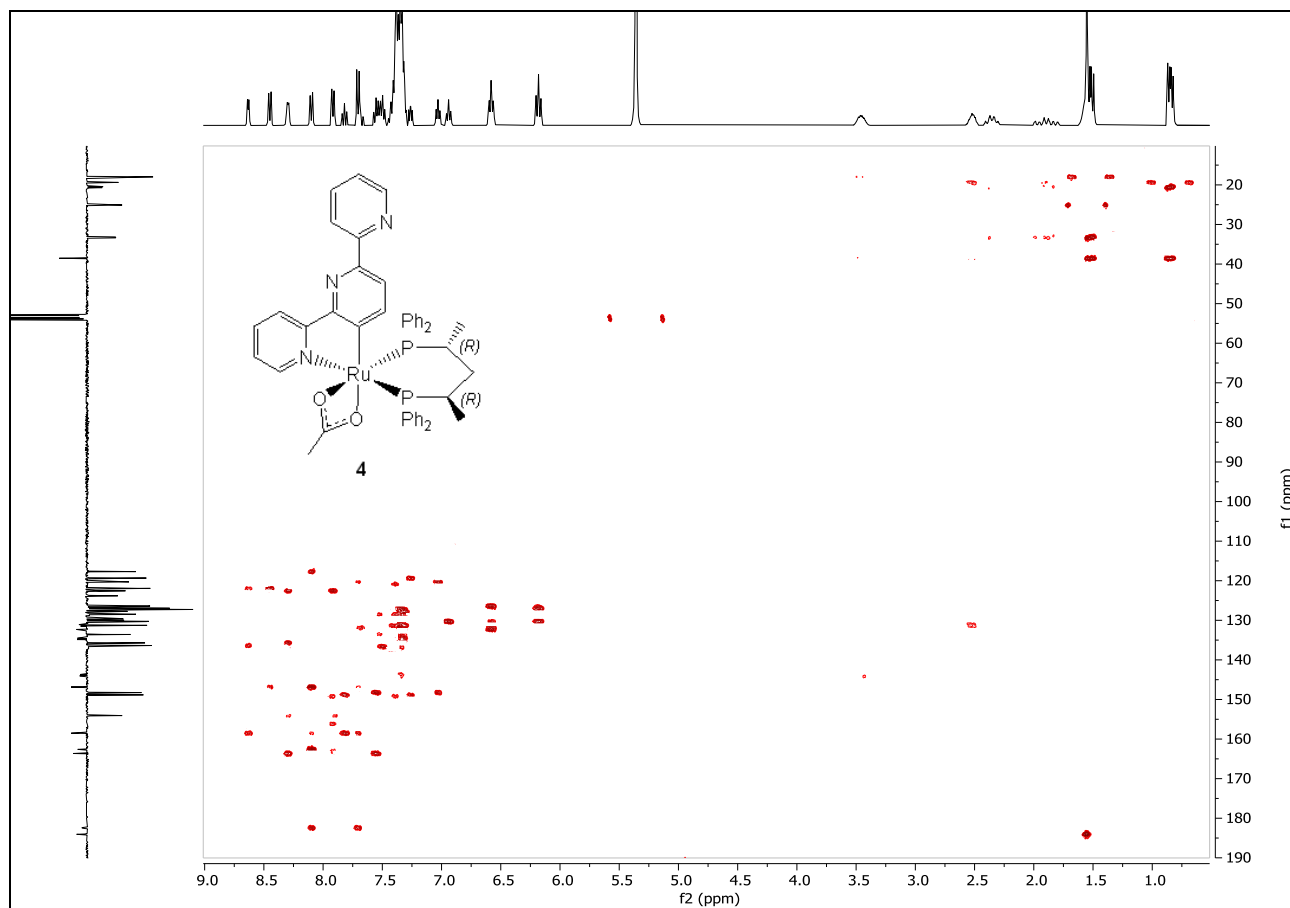

**Figure S21.**  $^1\text{H}$ - $^{13}\text{C}$  HMBC 2D NMR spectrum of  $[\text{Ru}(\eta^2\text{-OAc})(\text{NC-tpy})((R,R)\text{-Skewphos})]$  (**4**) in  $\text{CD}_2\text{Cl}_2$  at 25 °C.

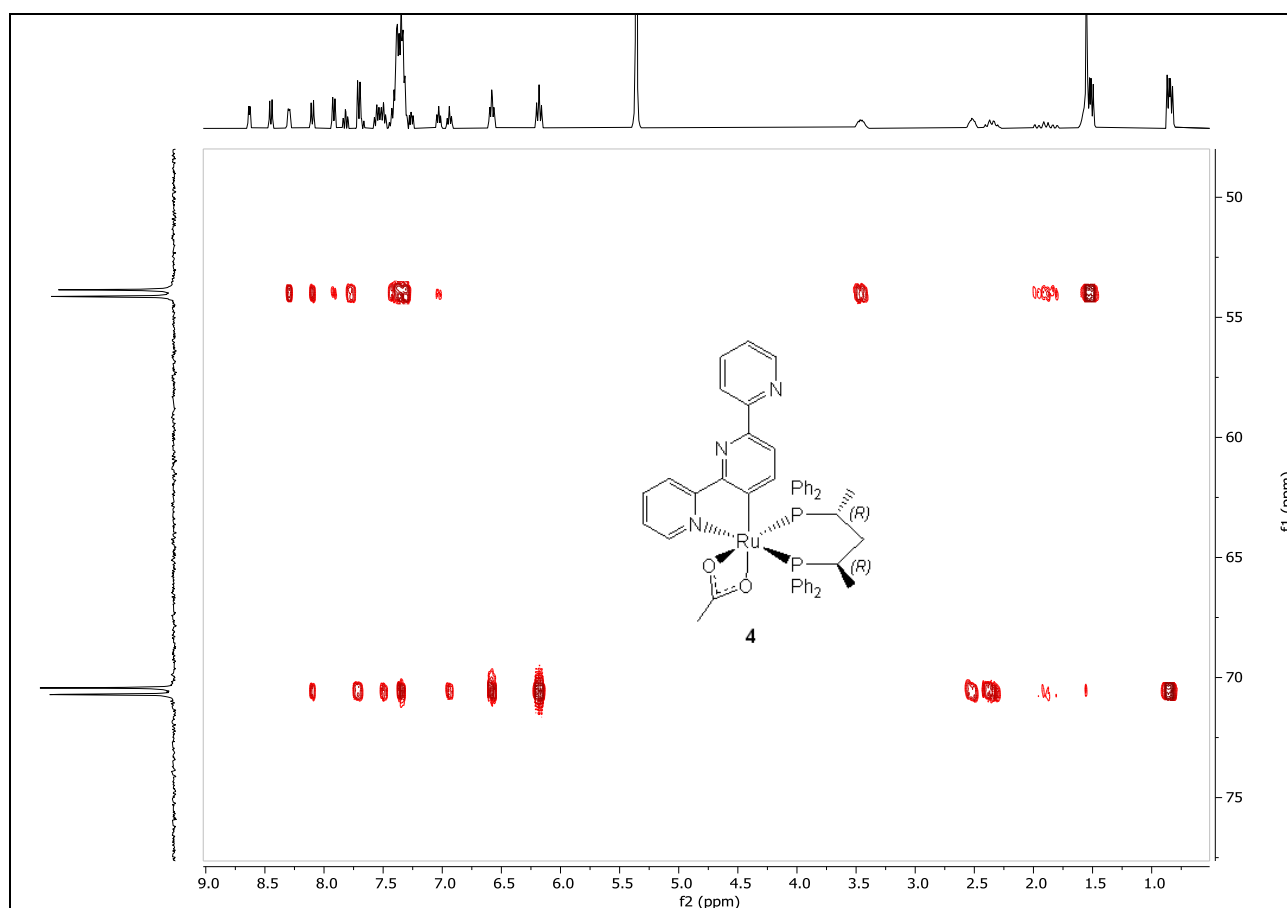

**Figure S22.**  $^1\text{H}$ - $^{31}\text{P}$  HMBC 2D NMR spectrum of  $[\text{Ru}(\eta^2\text{-OAc})(\text{NC-tpy})((R,R)\text{-Skewphos})]$  (**4**) in  $\text{CD}_2\text{Cl}_2$  at 25 °C.

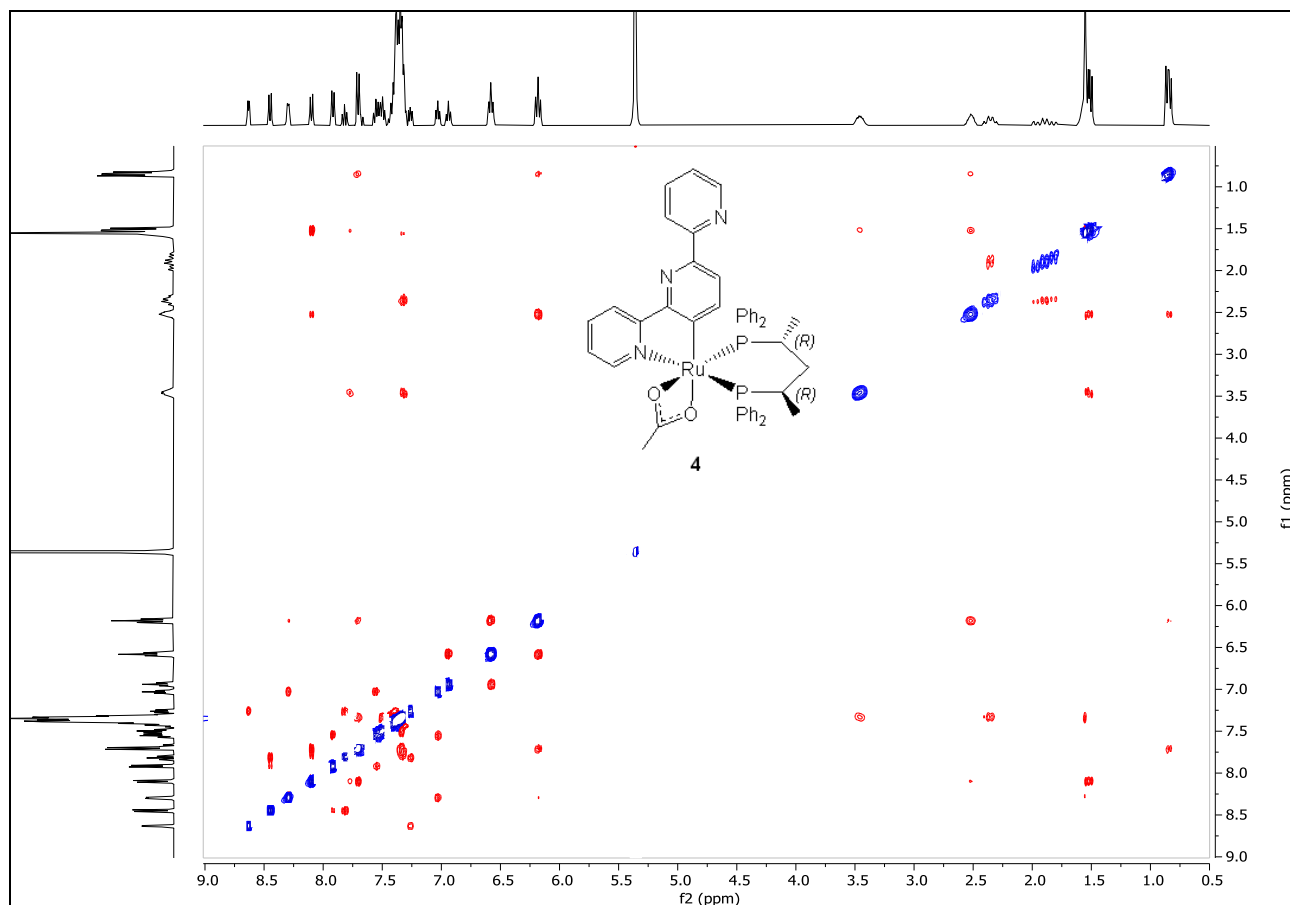

**Figure S23.**  $^1\text{H}$ - $^1\text{H}$  NOESY 2D NMR spectrum of  $[\text{Ru}(\eta^2\text{-OAc})(\text{NC-tpy})((R,R)\text{-Skewphos})]$  (**4**) in  $\text{CD}_2\text{Cl}_2$  at 25 °C.

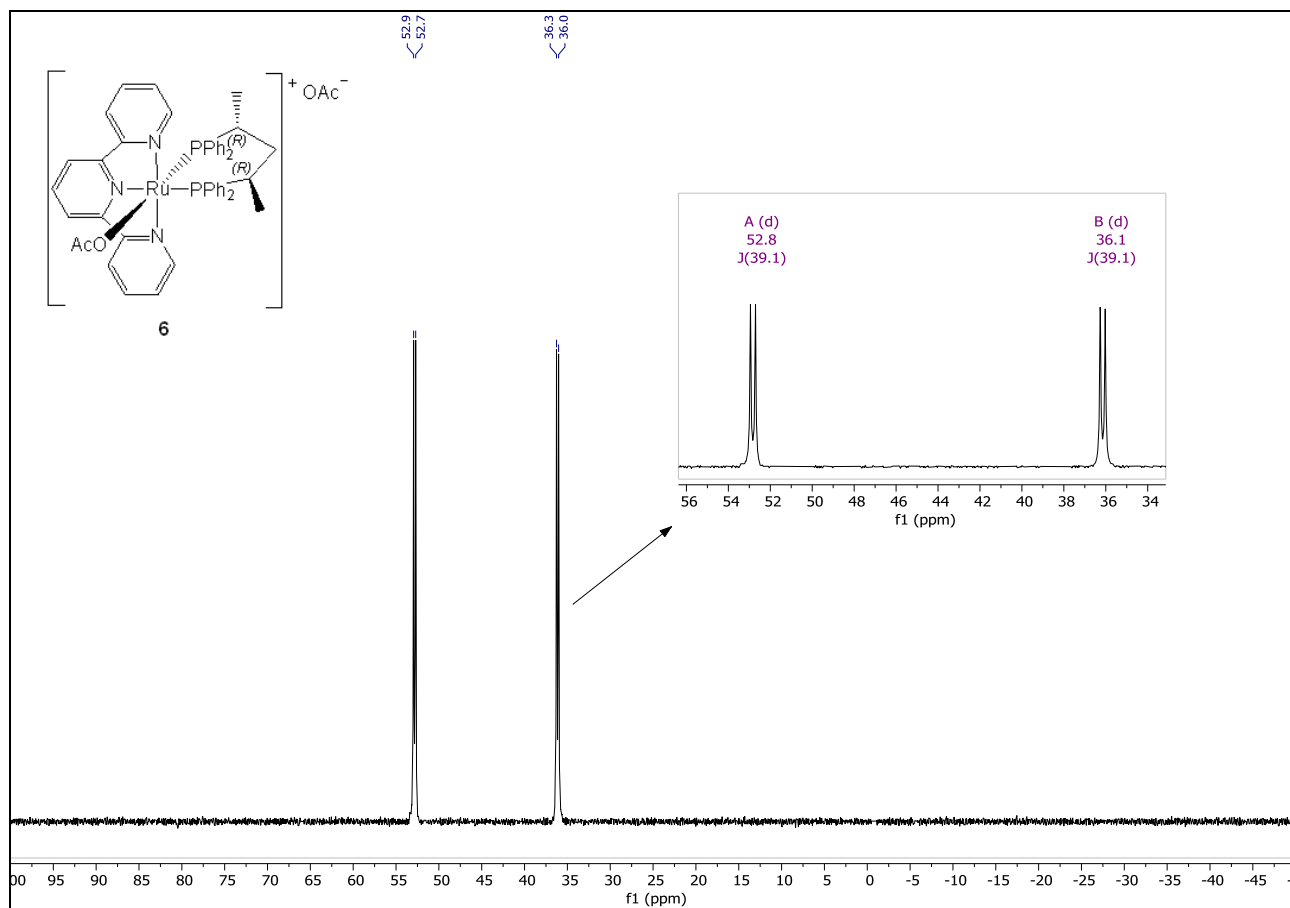

**Figure S24.** <sup>31</sup>P{<sup>1</sup>H} NMR spectrum (162.0 MHz) of [Ru(η<sup>1</sup>-OAc)(NNN-tpy)((R,R)-Skewphos)]OAc (**6**) in CD<sub>3</sub>OD at 25 °C.

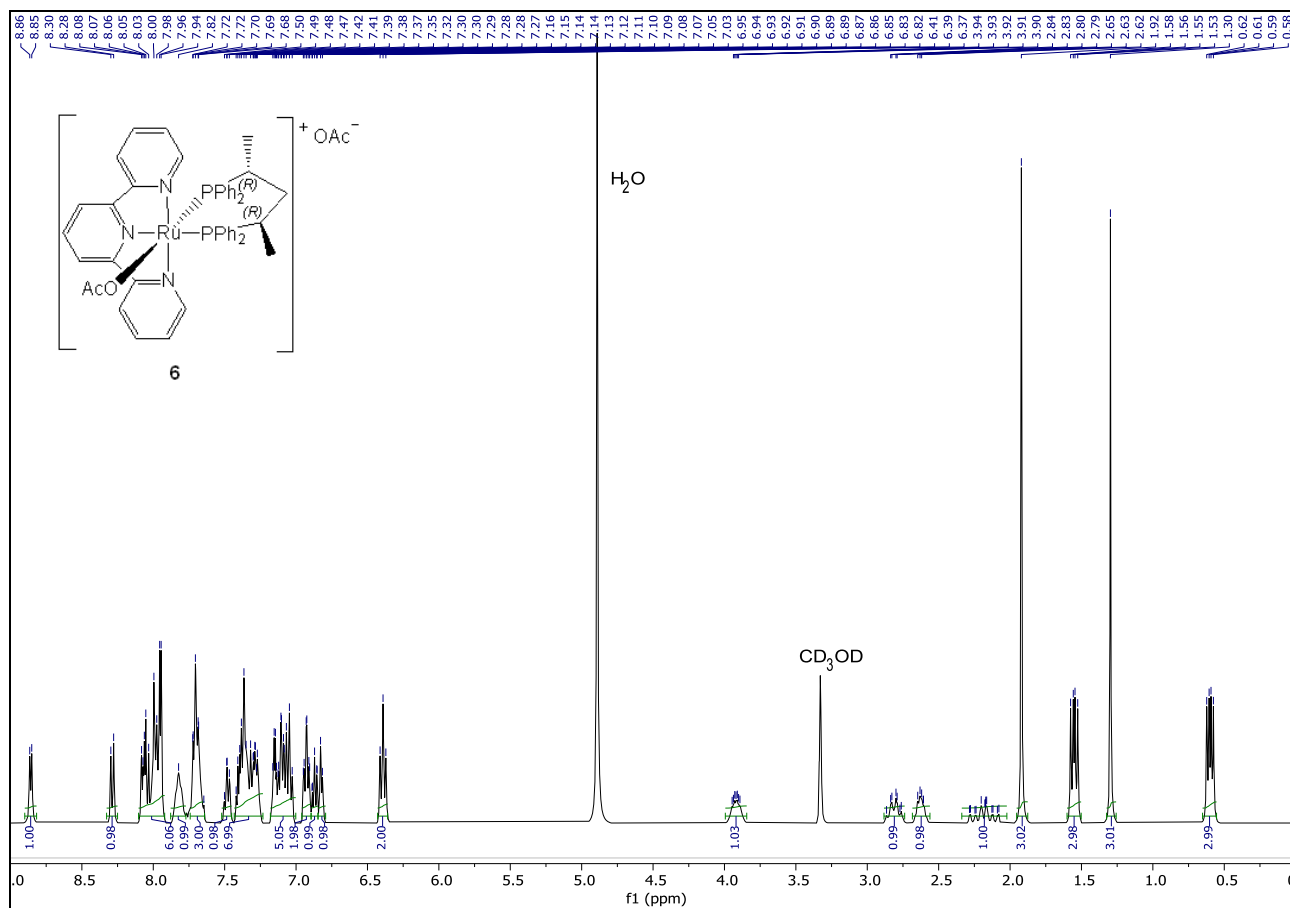

**Figure S25.** <sup>1</sup>H NMR spectrum (400.1 MHz) of [Ru(η<sup>1</sup>-OAc)(NNN-tpy)((*R,R*)-Skewphos)]OAc (**6**) in CD<sub>3</sub>OD at 25 °C.

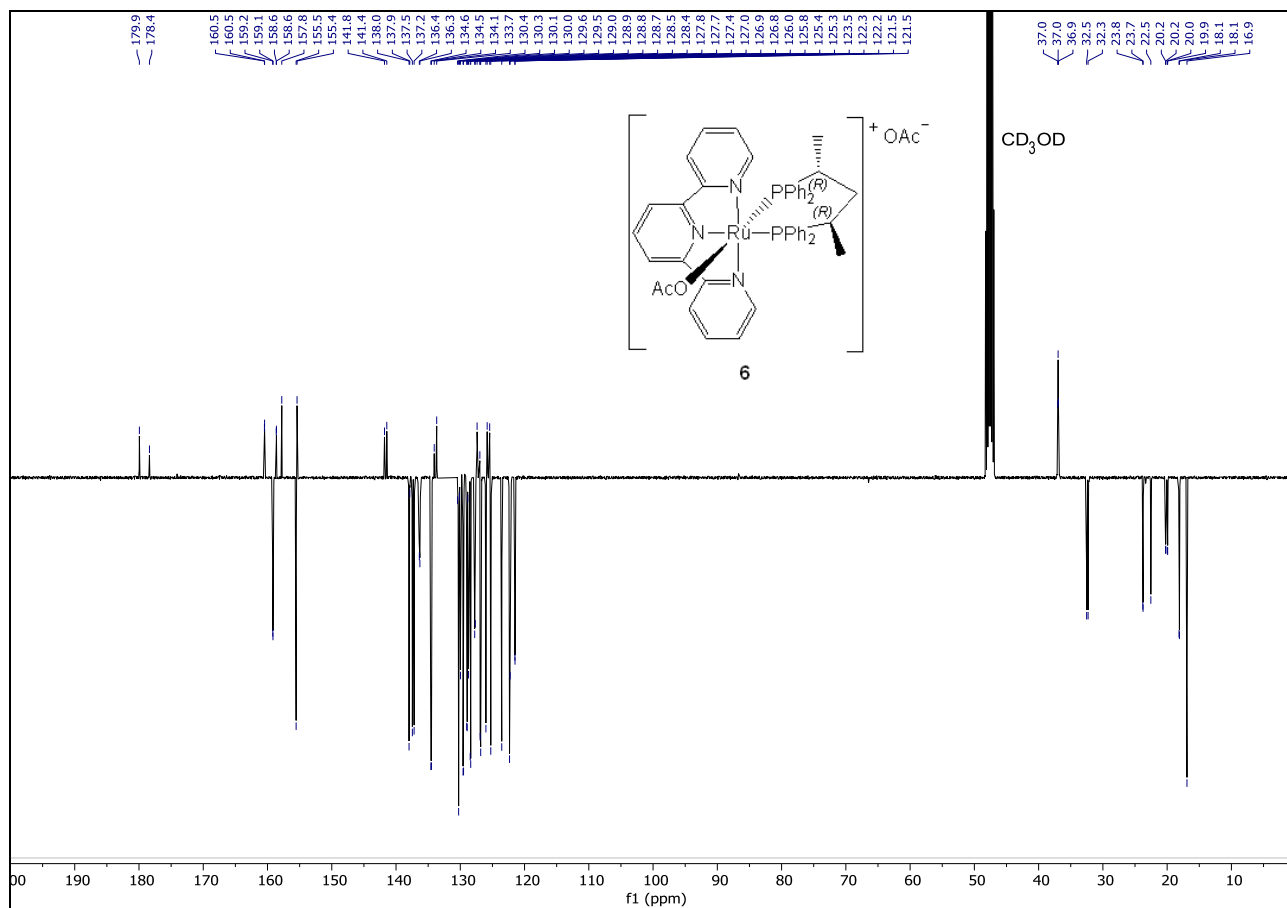

**Figure S26.**  $^{13}\text{C}\{^1\text{H}\}$  DEPTQ NMR spectrum (100.6 MHz) of  $[\text{Ru}(\eta^1\text{-OAc})(\text{NNN-tpy})((R,R)\text{-Skewphos})]\text{OAc}$  (**6**) in  $\text{CD}_3\text{OD}$  at 25 °C.

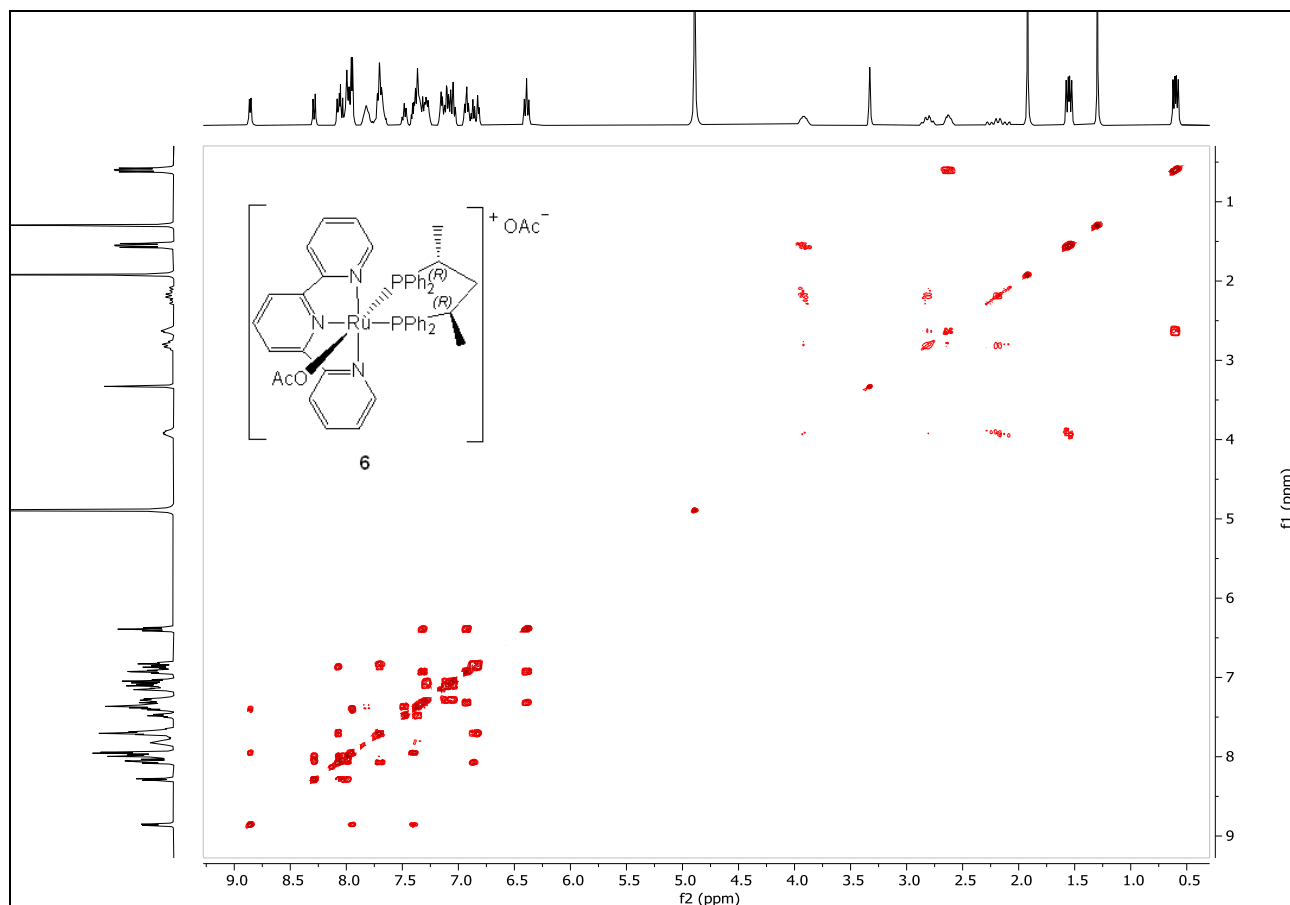

**Figure S27.**  $^1\text{H}$ - $^1\text{H}$  COSY 2D NMR spectrum of  $[\text{Ru}(\eta^1\text{-OAc})(\text{NNN-tpy})((R,R)\text{-Skewphos})]\text{OAc}$  (**6**) in  $\text{CD}_3\text{OD}$  at 25 °C.

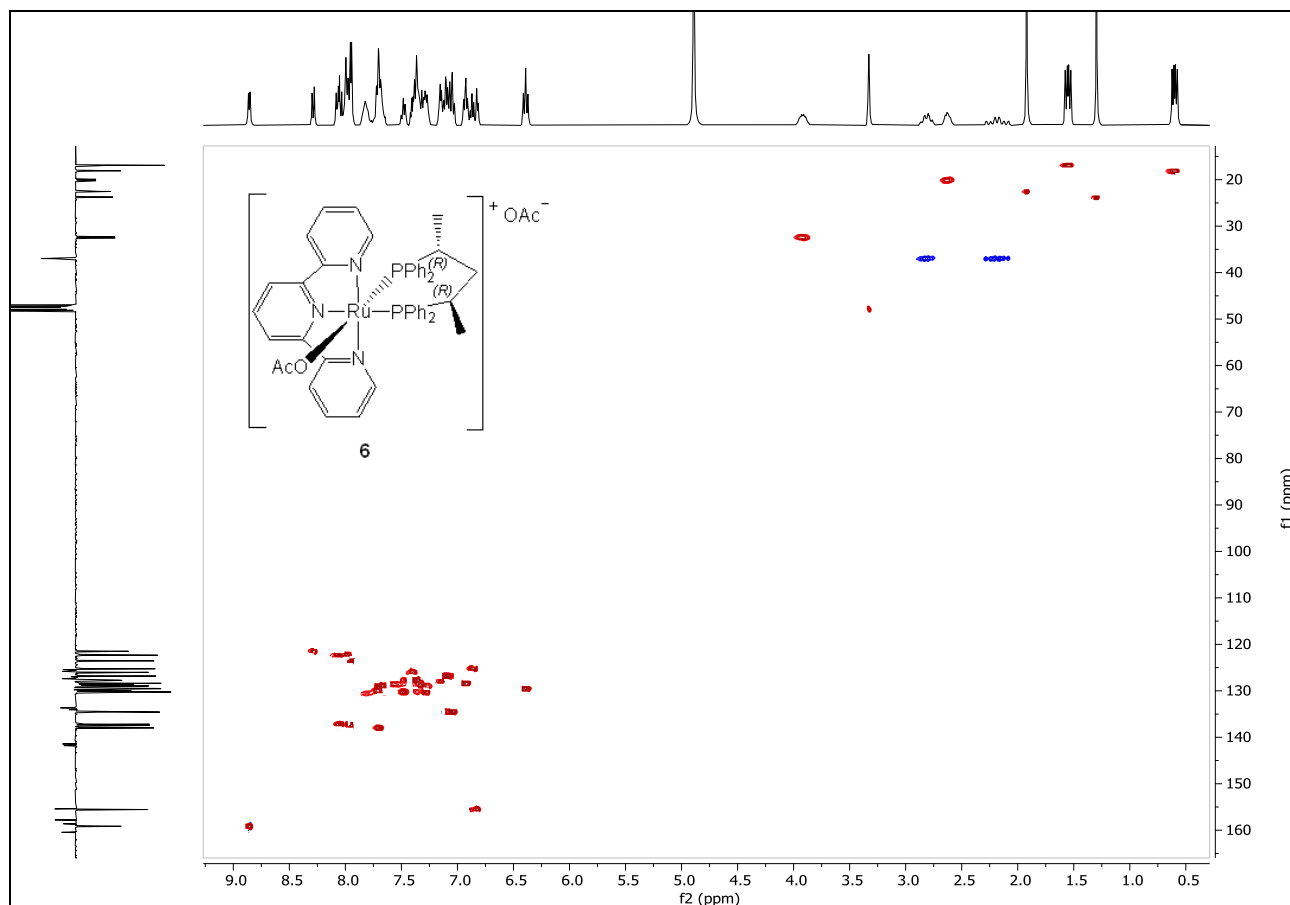

**Figure S28.**  $^1\text{H}$ - $^{13}\text{C}$  HSQC 2D NMR spectrum of  $[\text{Ru}(\eta^1\text{-OAc})(\text{NNN-tpy})((R,R)\text{-Skewphos})]\text{OAc}$  (**6**) in  $\text{CD}_3\text{OD}$  at 25 °C.



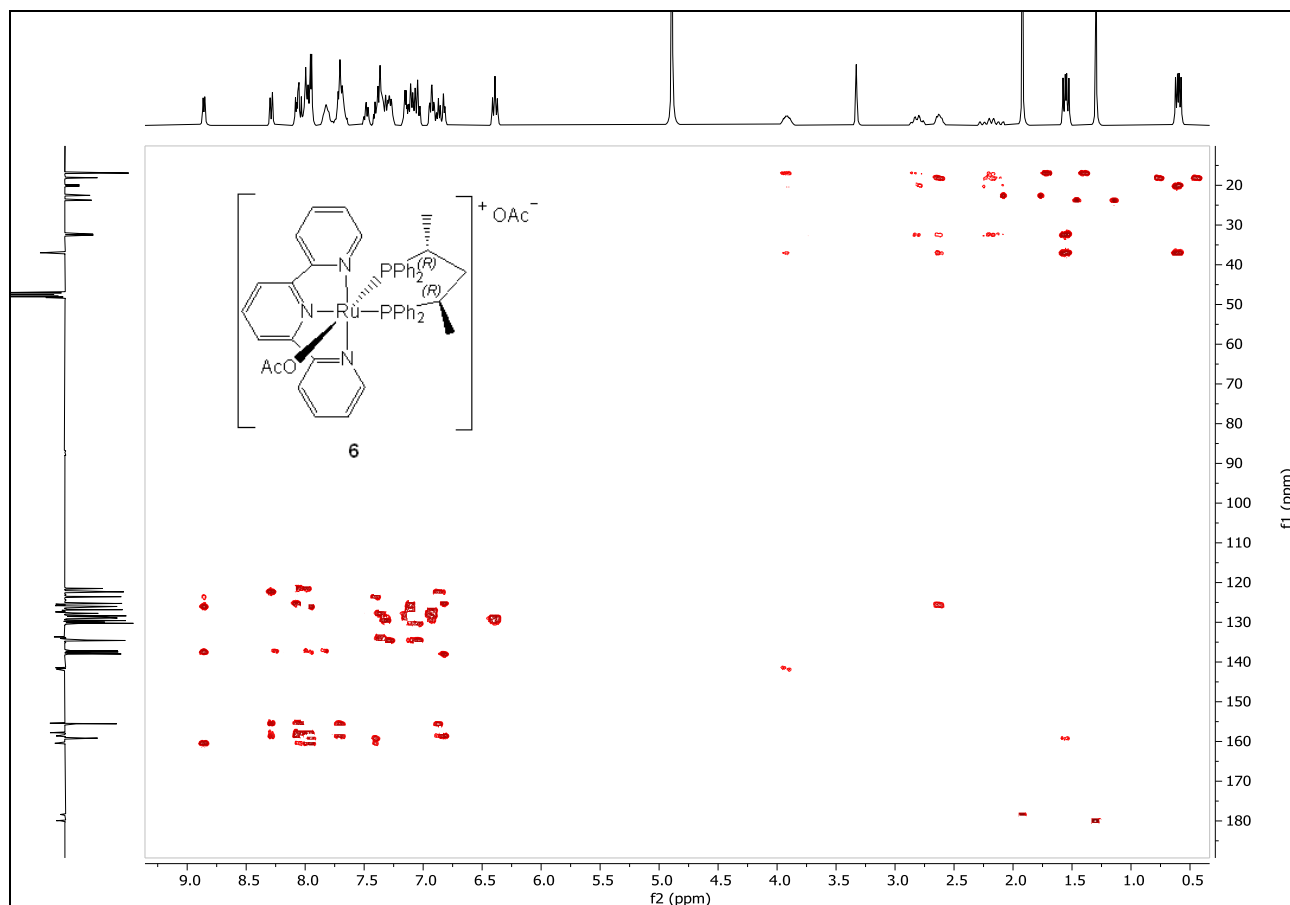

**Figure S29.**  $^1\text{H}$ - $^{13}\text{C}$  HMBC 2D NMR spectrum of  $[\text{Ru}(\eta^1\text{-OAc})(\text{NNN-tpy})((R,R)\text{-Skewphos})]\text{OAc}$  (**6**) in  $\text{CD}_3\text{OD}$  at 25 °C.

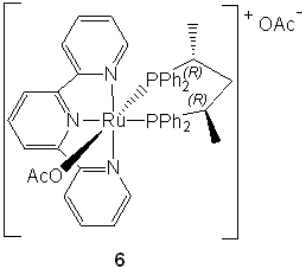

S34

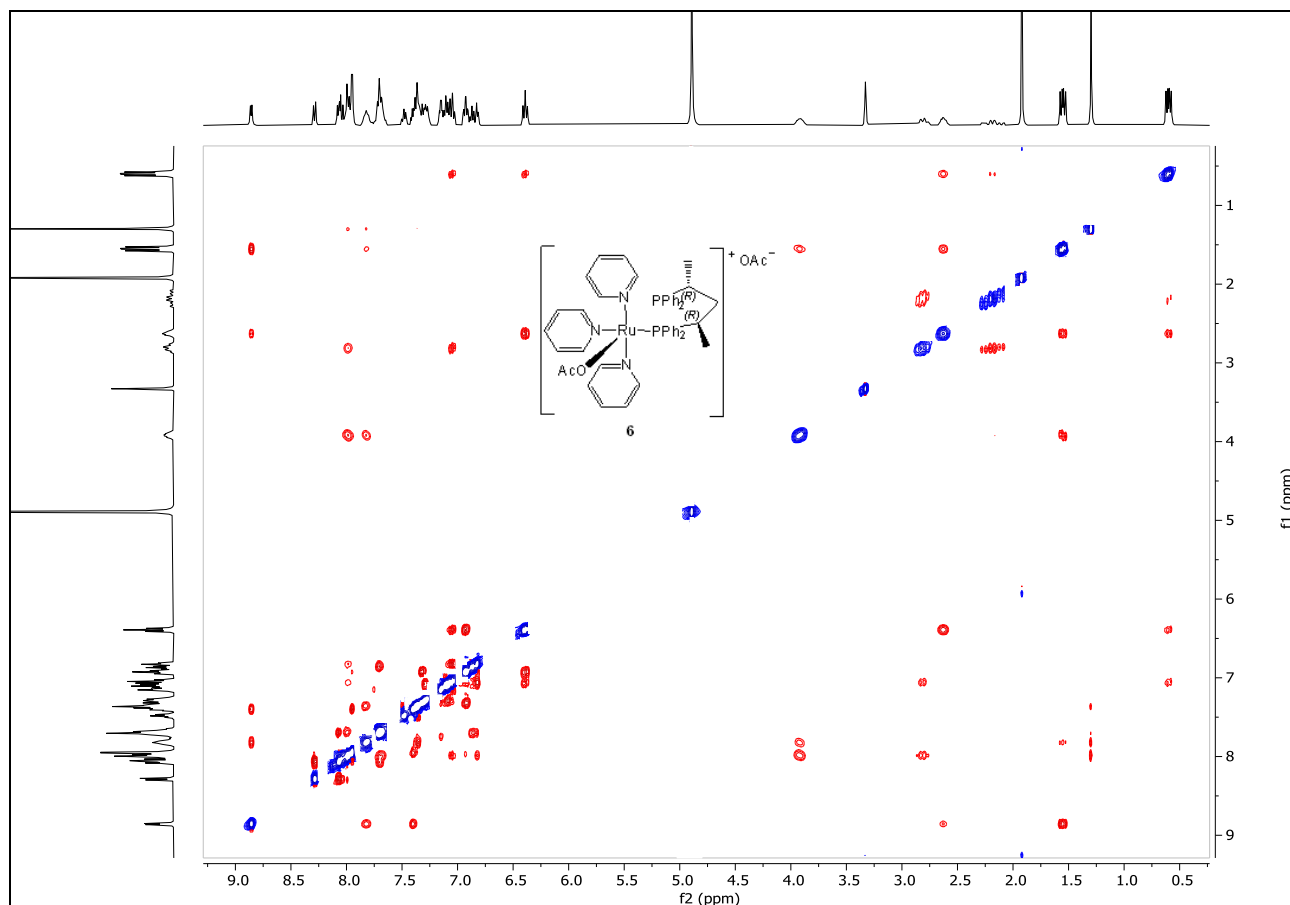

**Figure S31.** <sup>1</sup>H-<sup>1</sup>H NOESY 2D NMR spectrum of [Ru(η<sup>1</sup>-OAc)(NNN-tpy)((*R,R*)-Skewphos)]OAc (**6**) in CD<sub>3</sub>OD at 25 °C.

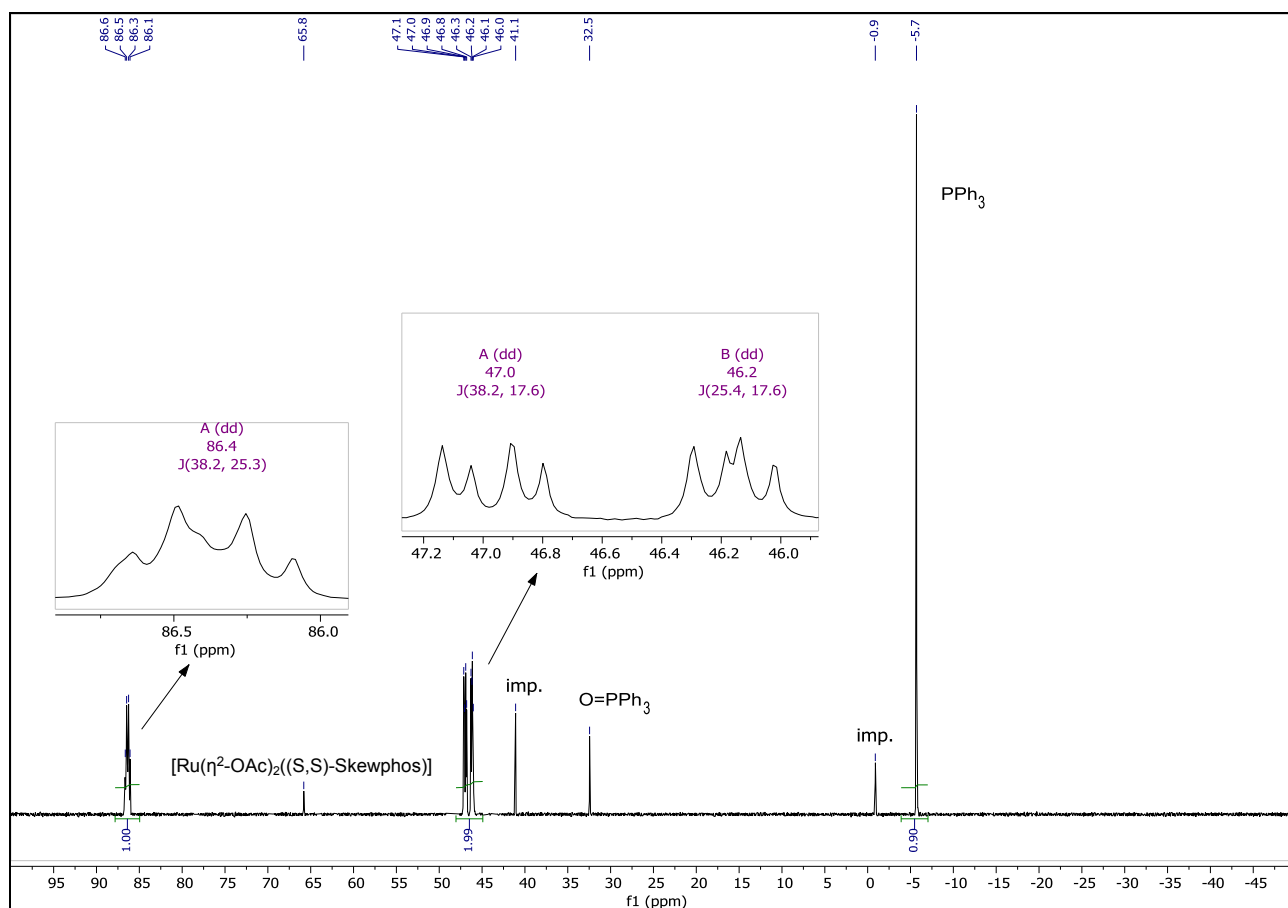

**Figure S32.** Evidence of the formation of the  $[\text{Ru}(\text{OAc})_2((S,S)\text{-Skewphos})(\text{PPh}_3)]$  intermediate in the reaction of  $(S,S)\text{-Skewphos}$  with  $[\text{Ru}(\eta^2\text{-OAc})_2(\text{PPh}_3)_2]$  in methanol at reflux in the  $^{31}\text{P}\{^1\text{H}\}$  NMR spectrum (162.0 MHz) with  $\text{CD}_3\text{OD}$  as lock at 25 °C.

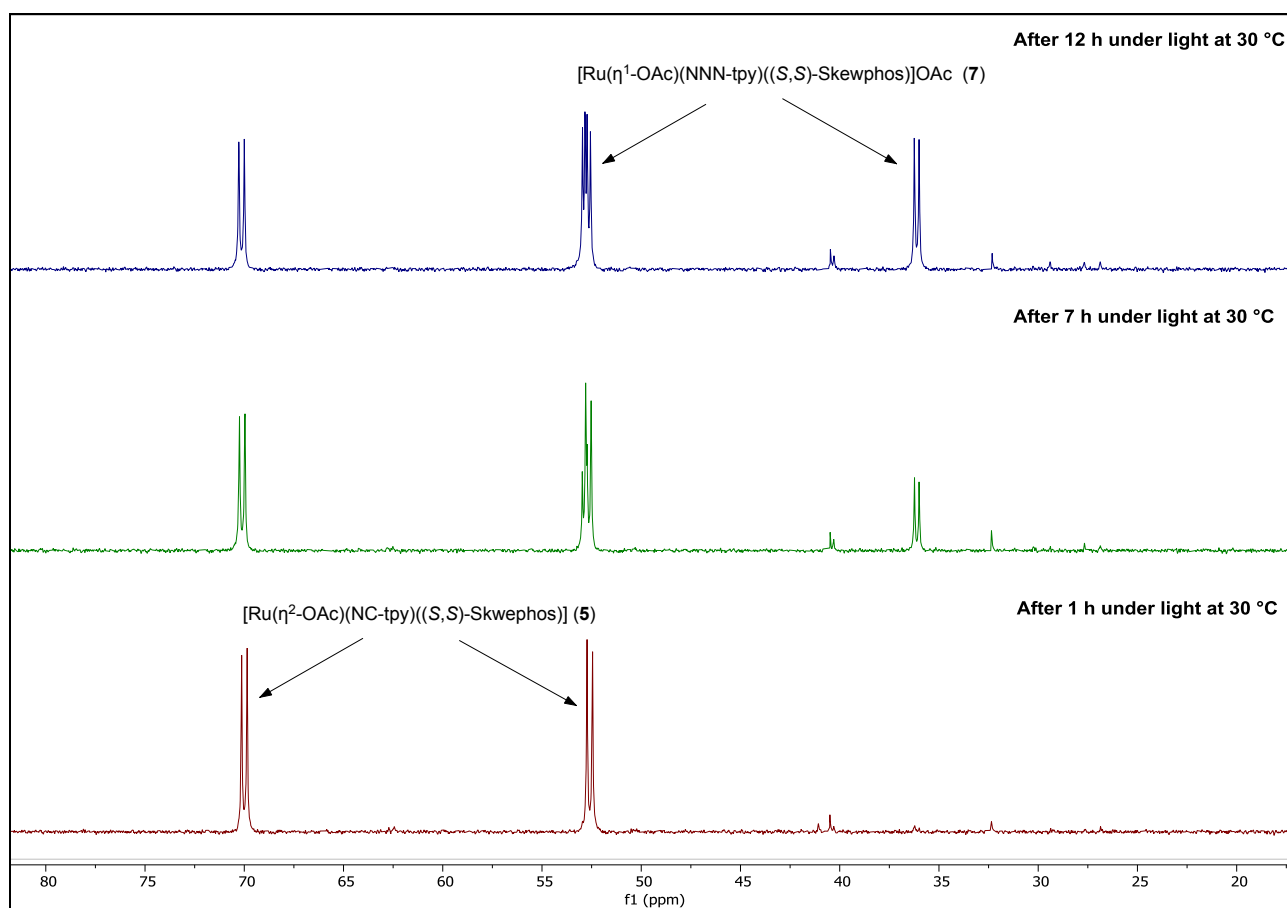

**Figure S33.** Conversion of complex  $[\text{Ru}(\eta^2\text{-OAc})(\text{NC-tpy})((S,S)\text{-Skewphos})]$  (**5**) to the cationic specie  $[\text{Ru}(\eta^1\text{-OAc})(\text{NNN-tpy})((S,S)\text{-Skewphos})]\text{OAc}$  (**7**) promoted by light with acetic acid (3 equiv) at 30 °C in the  $^{31}\text{P}\{^1\text{H}\}$  NMR spectra (162.0 MHz) in  $\text{CD}_3\text{OD}$  (recorded at 25 °C).

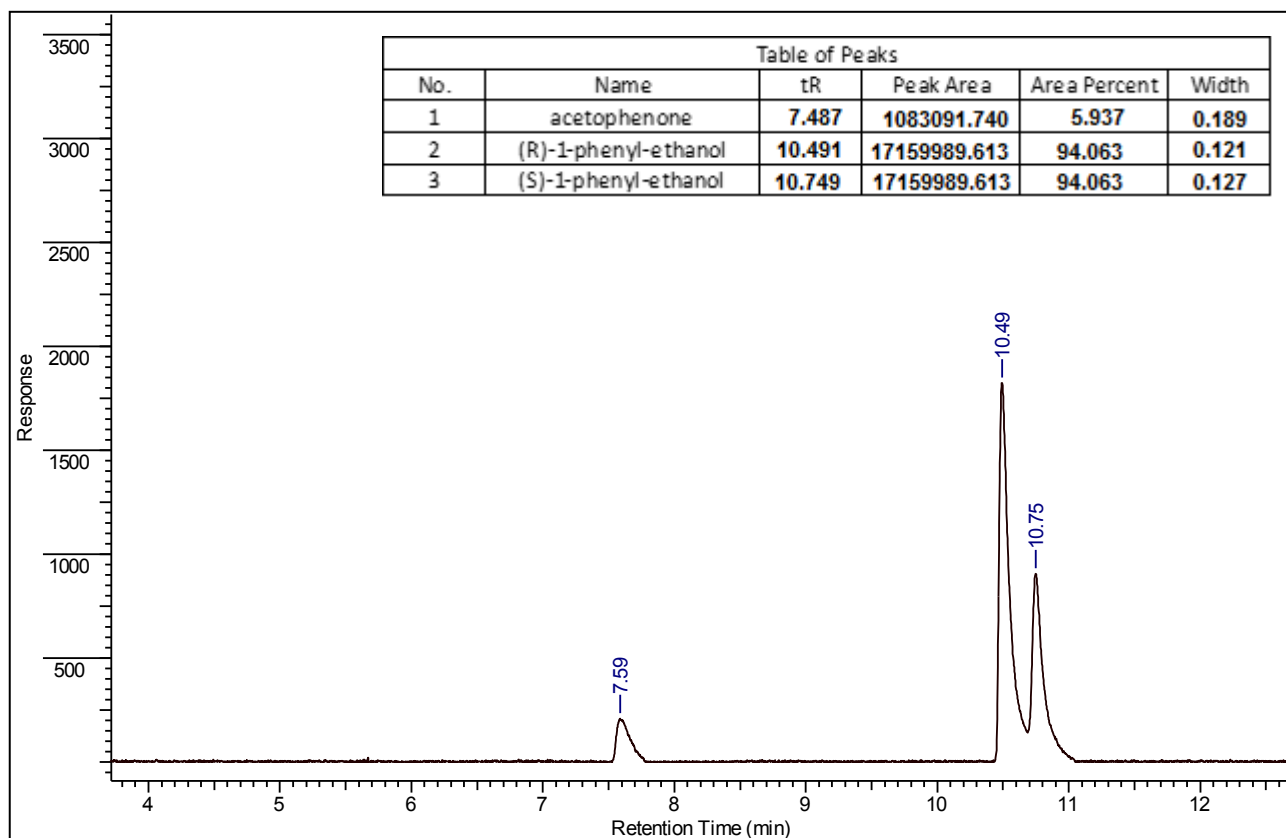

**Figure S34.** GC-FID chromatogram of the reaction mixture of the enantioselective photocatalytic TH of acetophenone in 2-propanol/MeOH 1:1 (v/v) at 30 °C and NaOiPr 2 mol% promoted by complex **7** at S/C 1000 after 28 h of overall irradiation. GC analyses were performed with a Varian CP-3380 gas chromatograph equipped with a 25 m length MEGADEX-ETTBDS- $\beta$  chiral column with hydrogen (5 psi) as the carrier gas and flame ionization detector (FID). The injector and detector temperature was 250 °C, with initial T = 95 °C ramped to 140 °C at 3 °C/min for a total of 15 min of analysis.

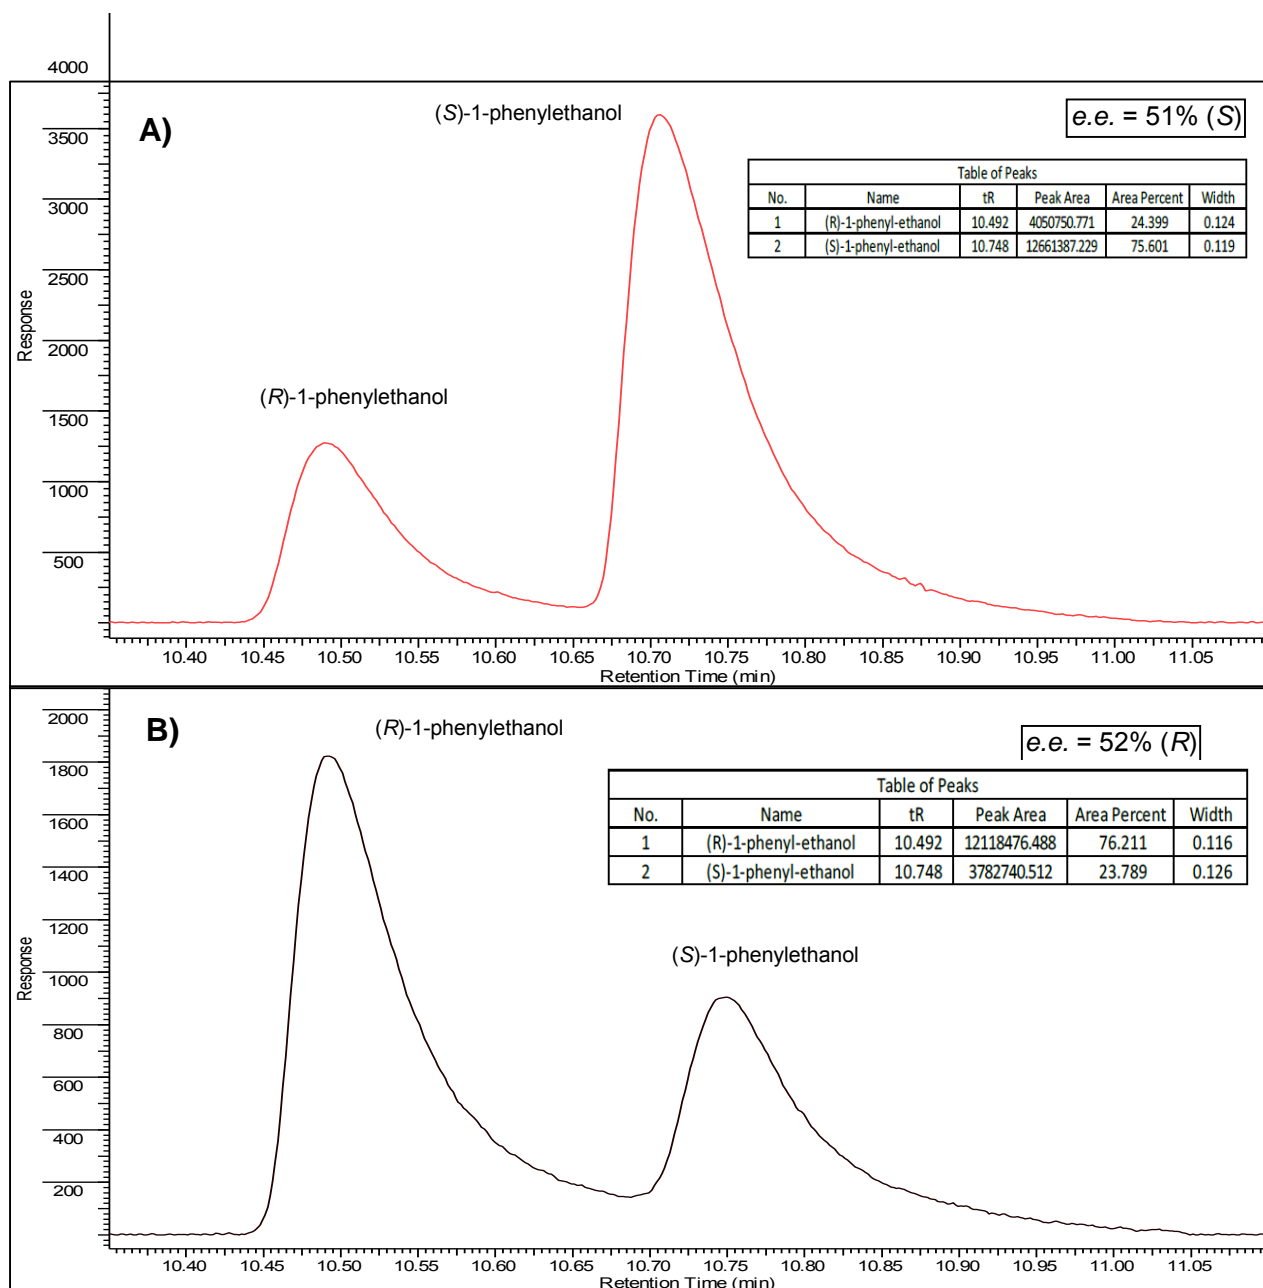

**Figure S35.** Comparison between the GC-FID chromatograms of the enantioselective photocatalytic TH of acetophenone in 2-propanol/MeOH 1:1 (v/v) with NaO<sup>t</sup>Pr 2 mol% at 30 °C promoted by complex **6** (A) and **7** (B) at S/C 1000.

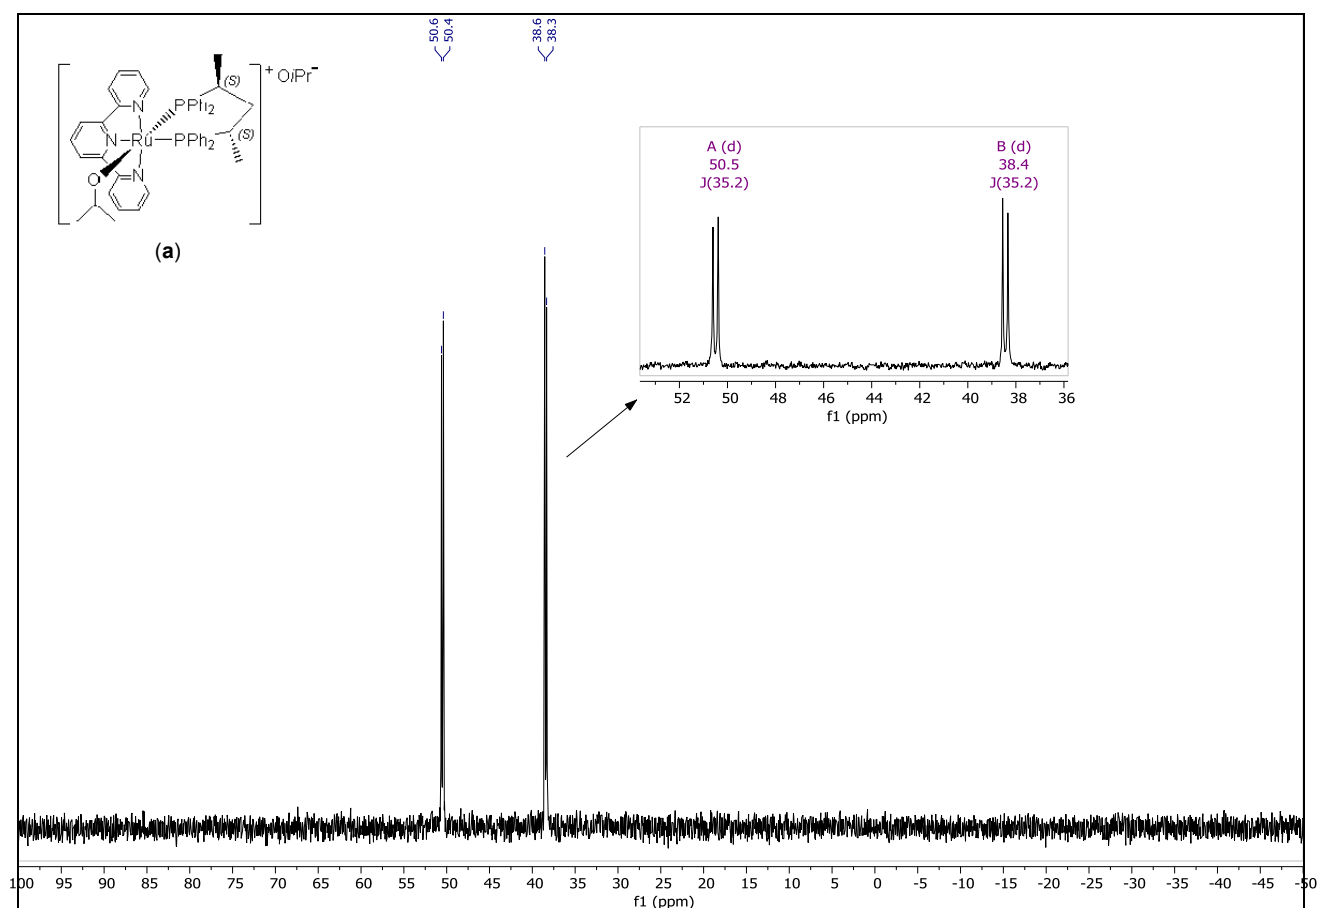

**Figure S36.**  $^{31}\text{P}\{^1\text{H}\}$  NMR spectrum (162.0 MHz) of  $[\text{Ru}(\text{OiPr})(\text{NNN-tpy})((S,S)\text{-Skewphos})](\text{OiPr})$  (a) in  $2\text{-propanol-}d^8$  at  $25^\circ\text{C}$ , obtained after 1 h of visible light irradiation from complex **7** in presence of  $\text{NaOiPr}$  (3 equiv).



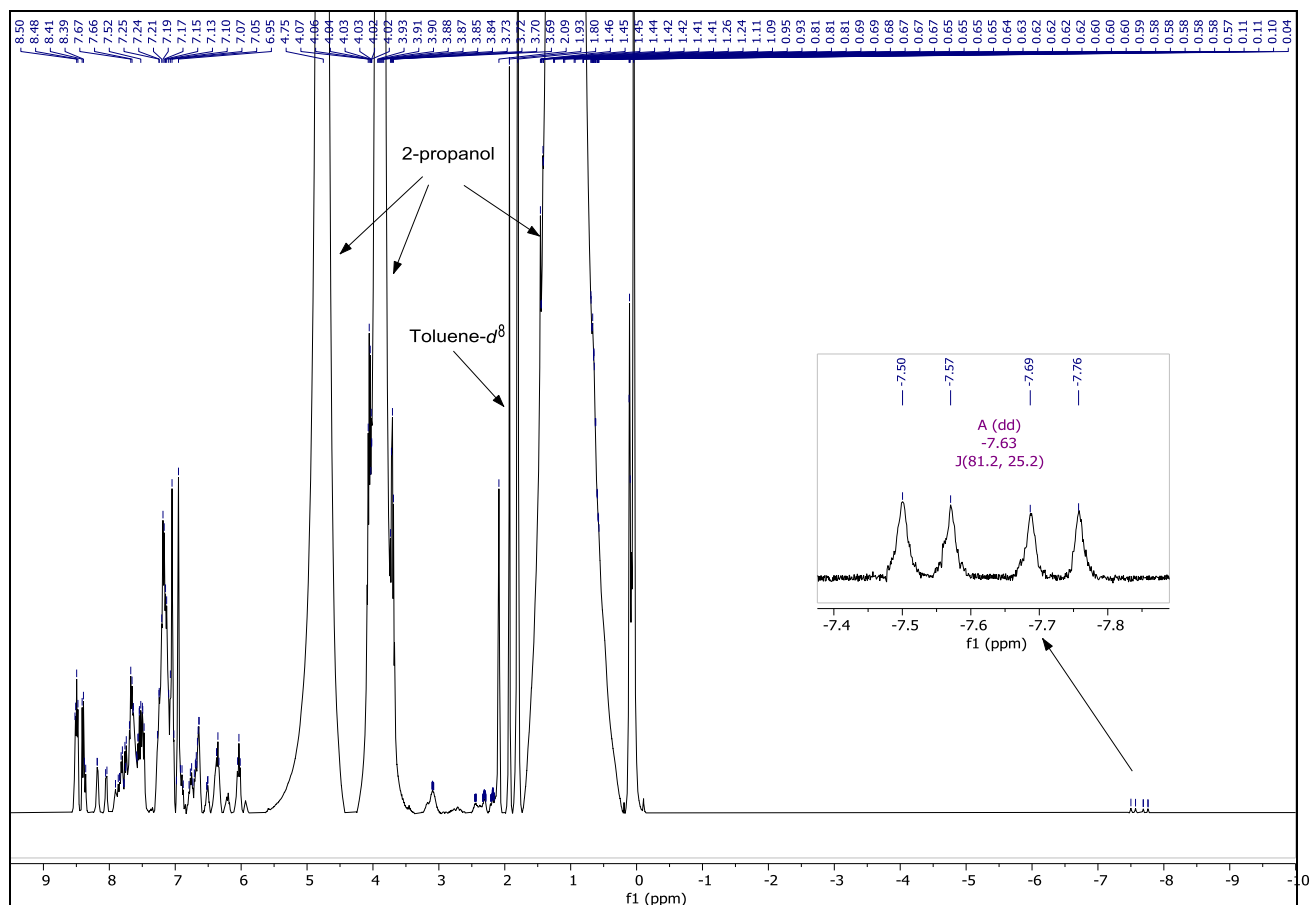

**Figure S37.**  $^1\text{H}$  NMR spectrum (400.1 MHz) with evidences of the formation of  $[\text{RuH}(\text{NNN-tpy})((S,S)\text{-Skewphos})](\text{OiPr})$  (**b**) in 2-propanol/toluene- $d^8$  1:1 (v/v) at 25 °C (in mixture with uncharacterized compounds), obtained after 6 h of visible light irradiation from complex **5** in presence of NaOiPr (3 equiv).

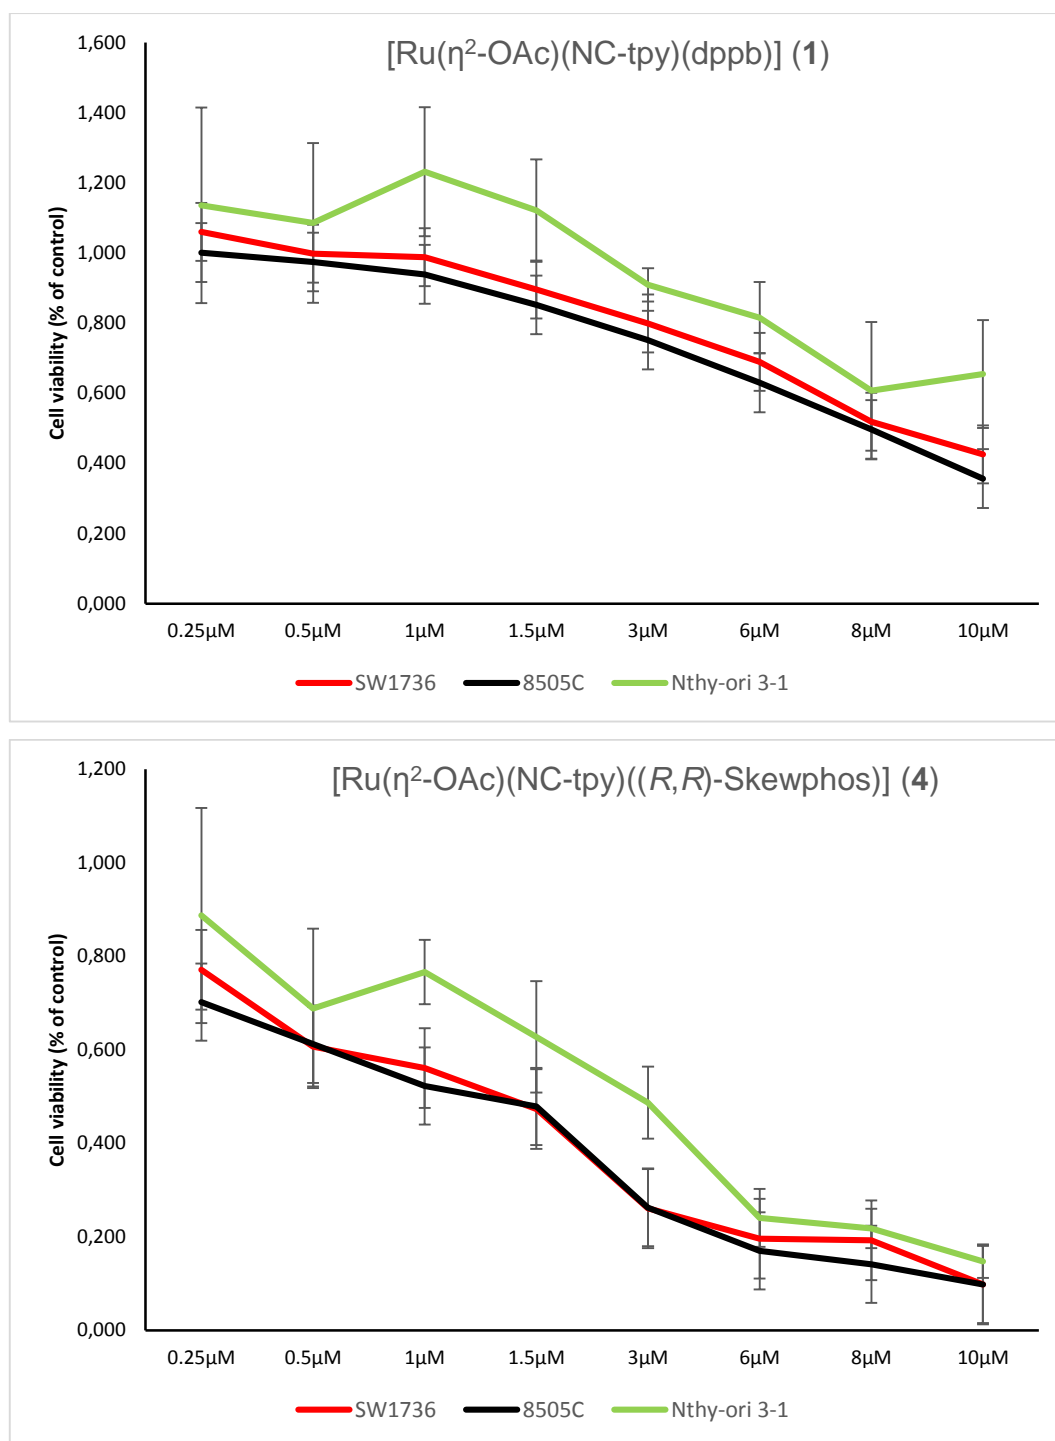

**Figure S38.** Effect of complexes **1** and **4** on ATC cell viability in SW1736 (red), 8505C (black) and Nthy-ori 3-1 (light green) cells. Cell viability was evaluated by using the MTT assay and expressed as the percentage of control (cells treated with DMSO alone). Each point represents the mean value of six-fold determinations. P-values obtained by statistical analysis (student's t test) are listed in the Table S1.

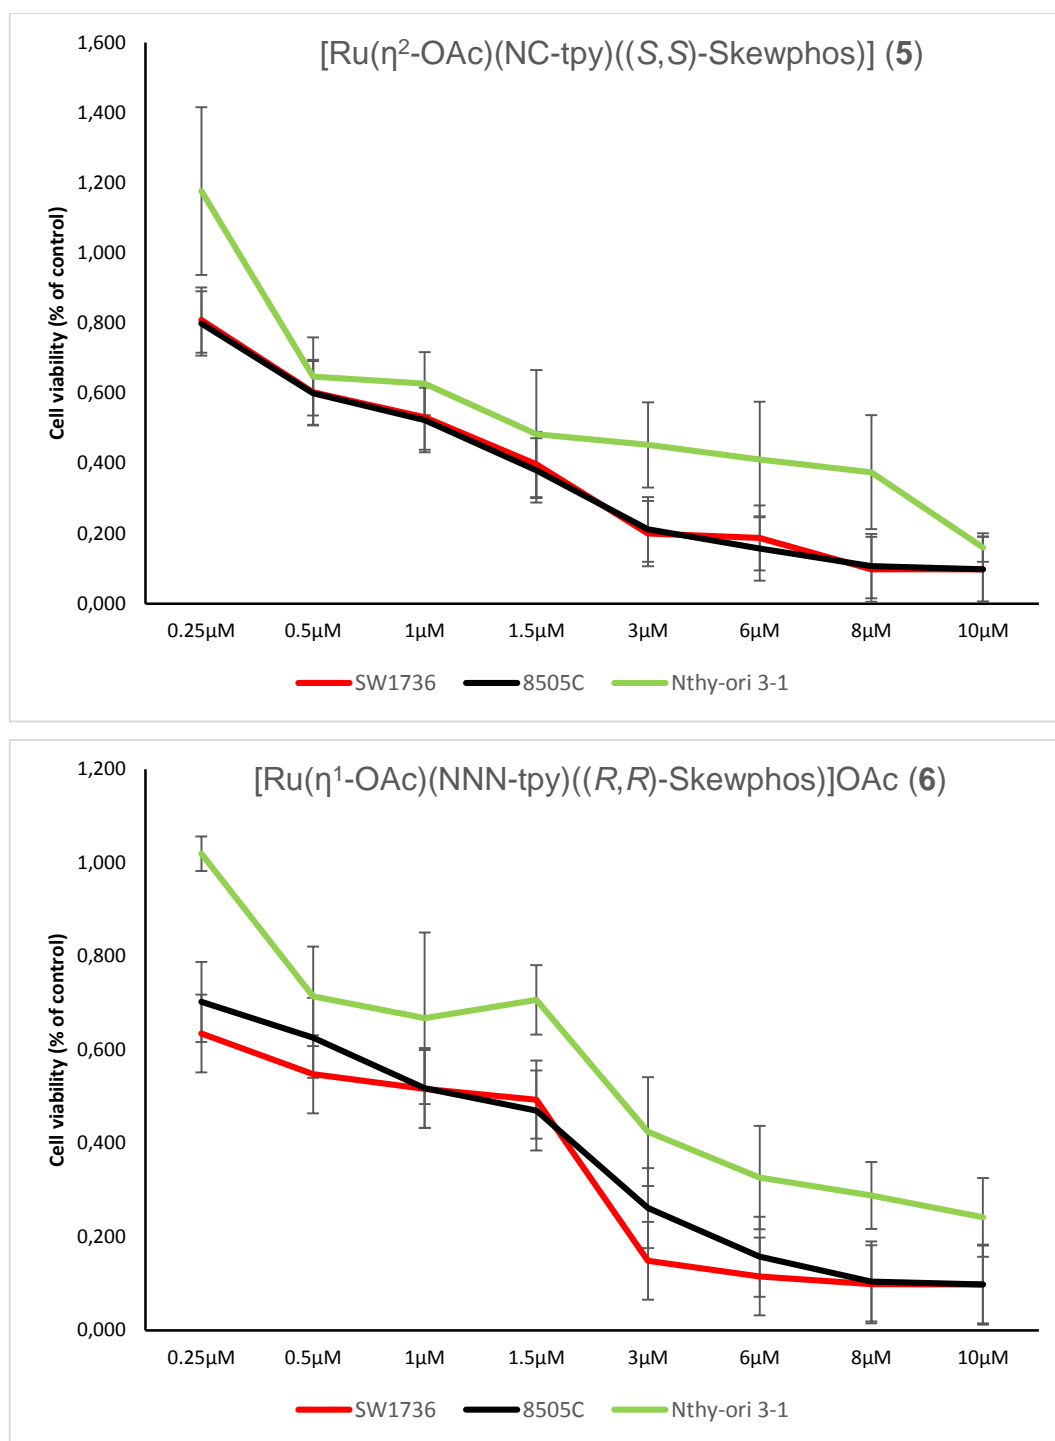

**Figure S39.** Effect of complexes **5** and **6** on ATC cell viability in SW1736 (red), 8505C (black) and Nthy-ori 3-1 (light green) cells. Cell viability was evaluated by using the MTT assay and expressed as the percentage of control (cells treated with DMSO alone). Each point represents the mean value of six-fold determinations. P-values obtained by statistical analysis (student's t test) are listed in the Table S1.

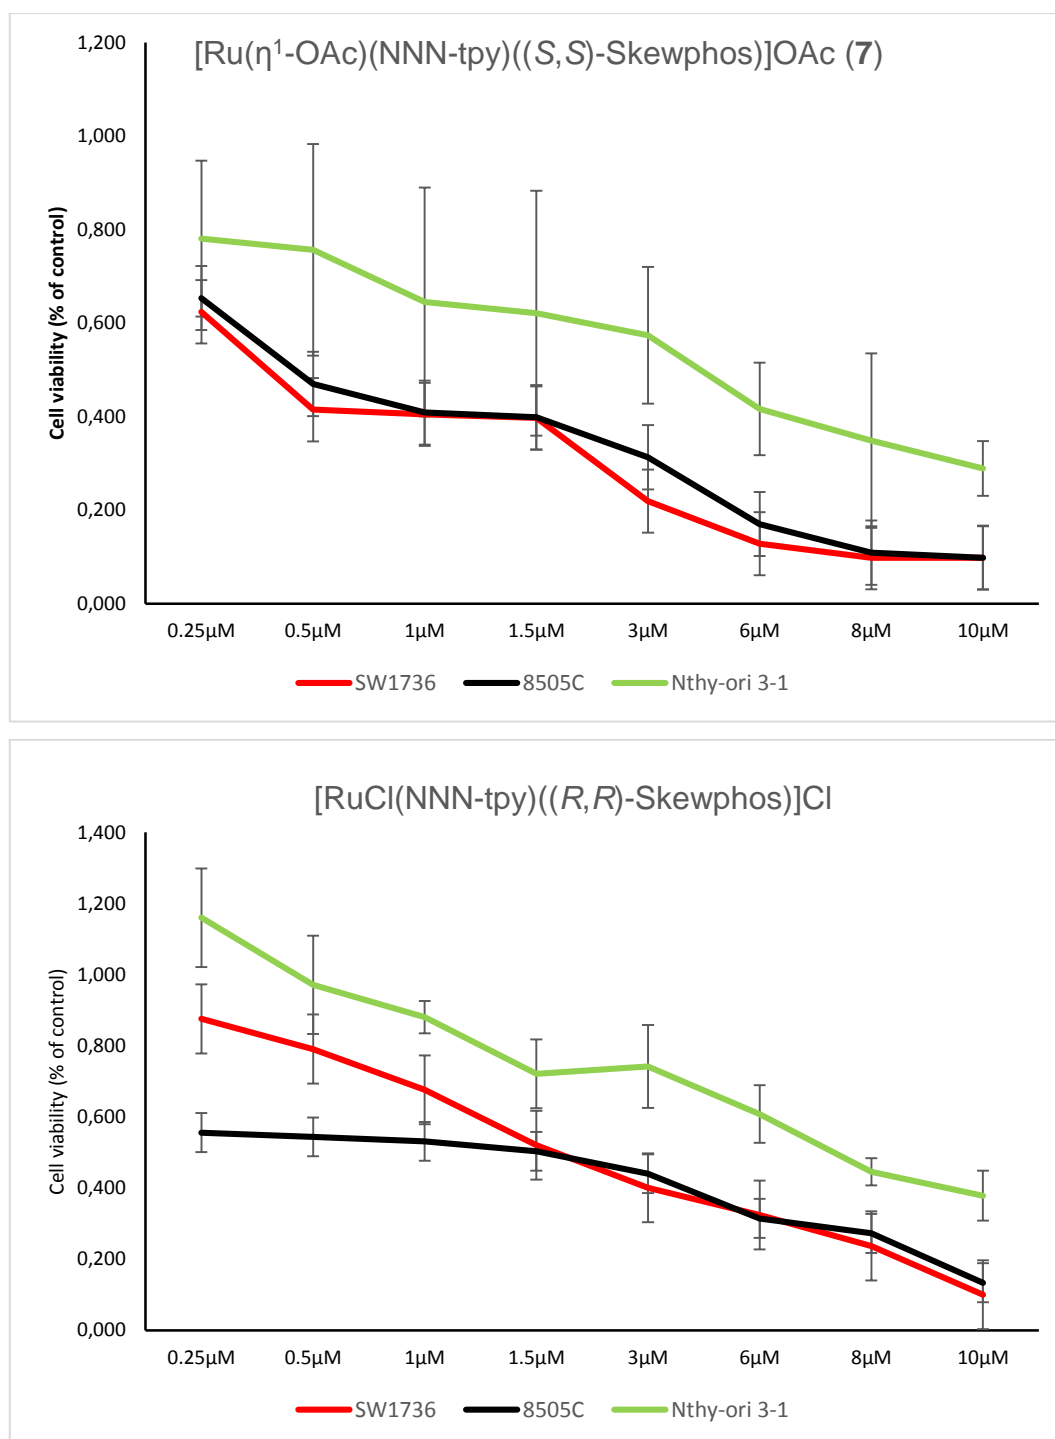

**Figure S40.** Effect of complexes **7** and [RuCl(NNN-tpy)((*R,R*)-Skewphos)]Cl on ATC cell viability in SW1736 (red), 8505C (black) and Nthy-ori 3-1 (light green) cells. Cell viability was evaluated by using the MTT assay and expressed as the percentage of control (cells treated with DMSO alone). Each point represents the mean value of six-fold determinations. P-values obtained by statistical analysis (student's t test) are listed in the Table S1.

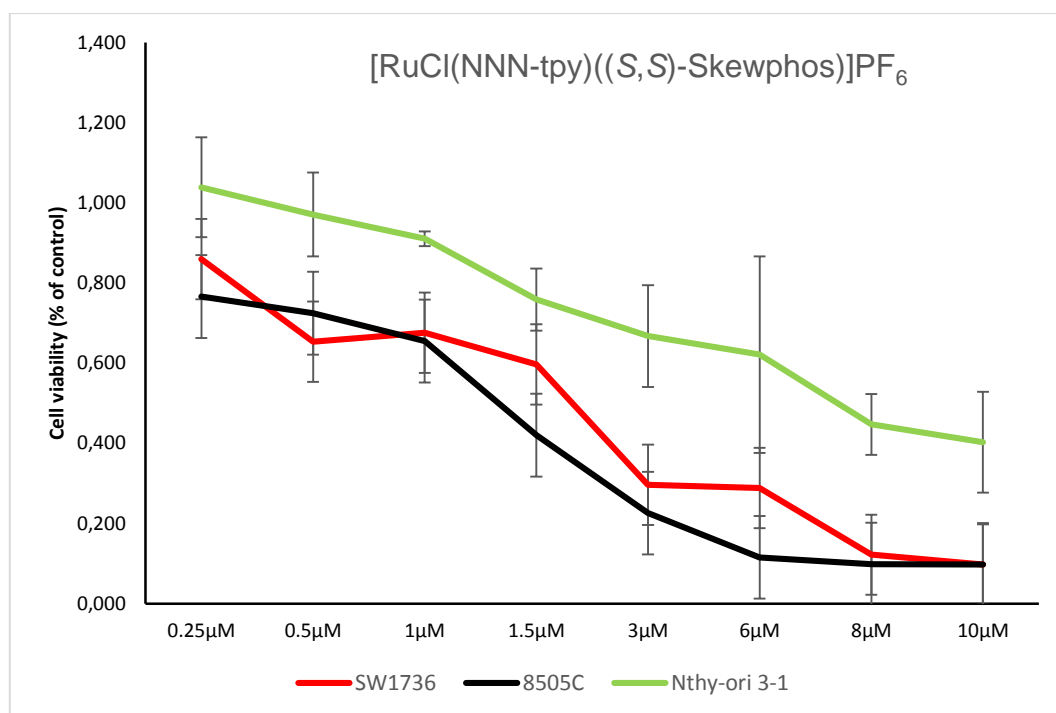

**Figure S41.** Effect of complex  $[\text{RuCl}(\text{NNN-tpy})((S,S)\text{-Skewphos})]\text{PF}_6$  on ATC cell viability in SW1736 (red), 8505C (black) and Nthy-ori 3-1 (light green) cells. Cell viability was evaluated by using the MTT assay and expressed as the percentage of control (cells treated with DMSO alone). Each point represents the mean value of six-fold determinations. P-values obtained by statistical analysis (student's t test) are listed in the Table S1.

|              | [RuCl(NNN-tpy)((R,R)-Skewphos)]Cl |       |              | [RuCl(NNN-tpy)((S,S)-Skewphos)]PF <sub>6</sub> |       |              | [Ru(η <sup>3</sup> -OAc)(NNN-tpy)((R,R)-Skewphos)]OAc (6) |       |              | [Ru(η <sup>3</sup> -OAc)(NC-tpy)(dppb)] (1) |       |              | [Ru(η <sup>3</sup> -OAc)(NC-tpy)((R,R)-Skewphos)] (4) |       |              | [Ru(η <sup>3</sup> -OAc)(NNN-tpy)((S,S)-Skewphos)]OAc (7) |       |              | [Ru(η <sup>3</sup> -OAc)(NC-tpy)((S,S)-Skewphos)] (5) |       |              |
|--------------|-----------------------------------|-------|--------------|------------------------------------------------|-------|--------------|-----------------------------------------------------------|-------|--------------|---------------------------------------------|-------|--------------|-------------------------------------------------------|-------|--------------|-----------------------------------------------------------|-------|--------------|-------------------------------------------------------|-------|--------------|
|              | SW1736                            | 8505C | Nthy-ori 3-1 | SW1736                                         | 8505C | Nthy-ori 3-1 | SW1736                                                    | 8505C | Nthy-ori 3-1 | SW1736                                      | 8505C | Nthy-ori 3-1 | SW1736                                                | 8505C | Nthy-ori 3-1 | SW1736                                                    | 8505C | Nthy-ori 3-1 | SW1736                                                | 8505C | Nthy-ori 3-1 |
| complex dose | SW1736                            | 8505C | Nthy-ori 3-1 | SW1736                                         | 8505C | Nthy-ori 3-1 | SW1736                                                    | 8505C | Nthy-ori 3-1 | SW1736                                      | 8505C | Nthy-ori 3-1 | SW1736                                                | 8505C | Nthy-ori 3-1 | SW1736                                                    | 8505C | Nthy-ori 3-1 | SW1736                                                | 8505C | Nthy-ori 3-1 |
| 0.25μM       | *                                 | *     | NS           | ***                                            | *     | NS           | *                                                         | ***   | NS           | NS                                          | NS    | NS           | *                                                     | *     | *            | *                                                         | *     | *            | NS                                                    | NS    | NS           |
| 0.5μM        | NS                                | *     | NS           | *                                              | *     | NS           | ***                                                       | *     | ***          | NS                                          | NS    | NS           | NS                                                    | NS    | *            | ***                                                       | ***   | NS           | NS                                                    | NS    | ***          |
| 1μM          | *                                 | *     | ***          | *                                              | *     | ***          | ***                                                       | ***   | *            | NS                                          | NS    | NS           | *                                                     | ***   | ***          | ***                                                       | ***   | *            | NS                                                    | NS    | ***          |
| 1.5μM        | ***                               | *     | ***          | ***                                            | *     | ***          | ***                                                       | ***   | ***          | *                                           | NS    | NS           | *                                                     | ***   | ***          | ***                                                       | ***   | *            | *                                                     | *     | ***          |
| 3μM          | ***                               | *     | *            | ***                                            | ***   | ***          | ***                                                       | ***   | ***          | NS                                          | NS    | *            | ***                                                   | ***   | ***          | ***                                                       | ***   | ***          | ***                                                   | ***   | ***          |
| 6μM          | ***                               | *     | ***          | ***                                            | ***   | *            | ***                                                       | ***   | ***          | *                                           | *     | *            | ***                                                   | ***   | ***          | ***                                                       | ***   | ***          | ***                                                   | ***   | ***          |
| 8μM          | ***                               | *     | ***          | ***                                            | ***   | ***          | ***                                                       | ***   | ***          | ***                                         | ***   | *            | ***                                                   | ***   | ***          | ***                                                       | ***   | ***          | ***                                                   | ***   | ***          |
| 10μM         | ***                               | ***   | ***          | ***                                            | ***   | ***          | ***                                                       | ***   | ***          | ***                                         | ***   | *            | ***                                                   | ***   | ***          | ***                                                       | ***   | ***          | ***                                                   | ***   | ***          |

**Table S1.** Statistical analysis for tested complexes. For each dose of each complex, the p-value in each of the two cell lines is listed. NS: not significant, \* p<0.05, \*\* p<0.01, \*\*\* p<0.001, \*\*\*\* p<0.0001.

## Single Crystal X-Ray Structure Determination of Compound 1 (CCDC 2302606).

### General Data

Data were collected on a Bruker D8 Venture single crystal x-ray diffractometer equipped with a CPAD detector (Bruker Photon II), an IMS microsource with MoK $\alpha$  radiation ( $\lambda = 0.71073$  Å) and a Helios optic using the APEX3 software package.<sup>83</sup> The measurement was performed on a single crystal coated with perfluorinated ether which was fixed on top of a kapton micro sampler and frozen under a stream of cold nitrogen. A matrix scan was used to determine the initial lattice parameters. Reflections were corrected for Lorentz and polarisation effects, scan speed, and background using SAINT.<sup>84</sup> Absorption correction, including odd and even ordered spherical harmonics was performed using SADABS.<sup>85</sup> Space group assignment was based upon systematic absences, E statistics, and successful refinement of the structure. The structure was solved using SHELXT with the aid of successive difference Fourier maps, and was refined against all data using SHELXL in conjunction with SHELXLE.<sup>86-88</sup> Hydrogen atoms were calculated in ideal positions as follows: Methyl hydrogen atoms were refined as part of rigid rotating groups, with a C–H distance of 0.98 Å and  $U_{\text{iso}}(\text{H}) = 1.5 \cdot U_{\text{eq}}(\text{C})$ . Non-methyl H atoms were placed in calculated positions and refined using a riding model with methylene, aromatic, and other C–H distances of 0.99 Å, 0.95 Å and 1.00 Å, respectively, and  $U_{\text{iso}}(\text{H}) = 1.2 \cdot U_{\text{eq}}(\text{C})$ . Non-hydrogen atoms were refined with anisotropic displacement parameters. Full-matrix least-squares refinements were carried out by minimizing  $\sum w(F_o^2 - F_c^2)^2$  with the SHELXL weighting scheme.<sup>86</sup> Neutral atom scattering factors for all atoms and anomalous dispersion corrections for the non-hydrogen atoms were taken from *International Tables for Crystallography*.<sup>89</sup> Images of the crystal structure were generated with Mercury.<sup>90</sup> CCDC 2302606 contains the supplementary crystallographic data for this paper. These data are provided free of charge by The Cambridge Crystallographic Data Centre.

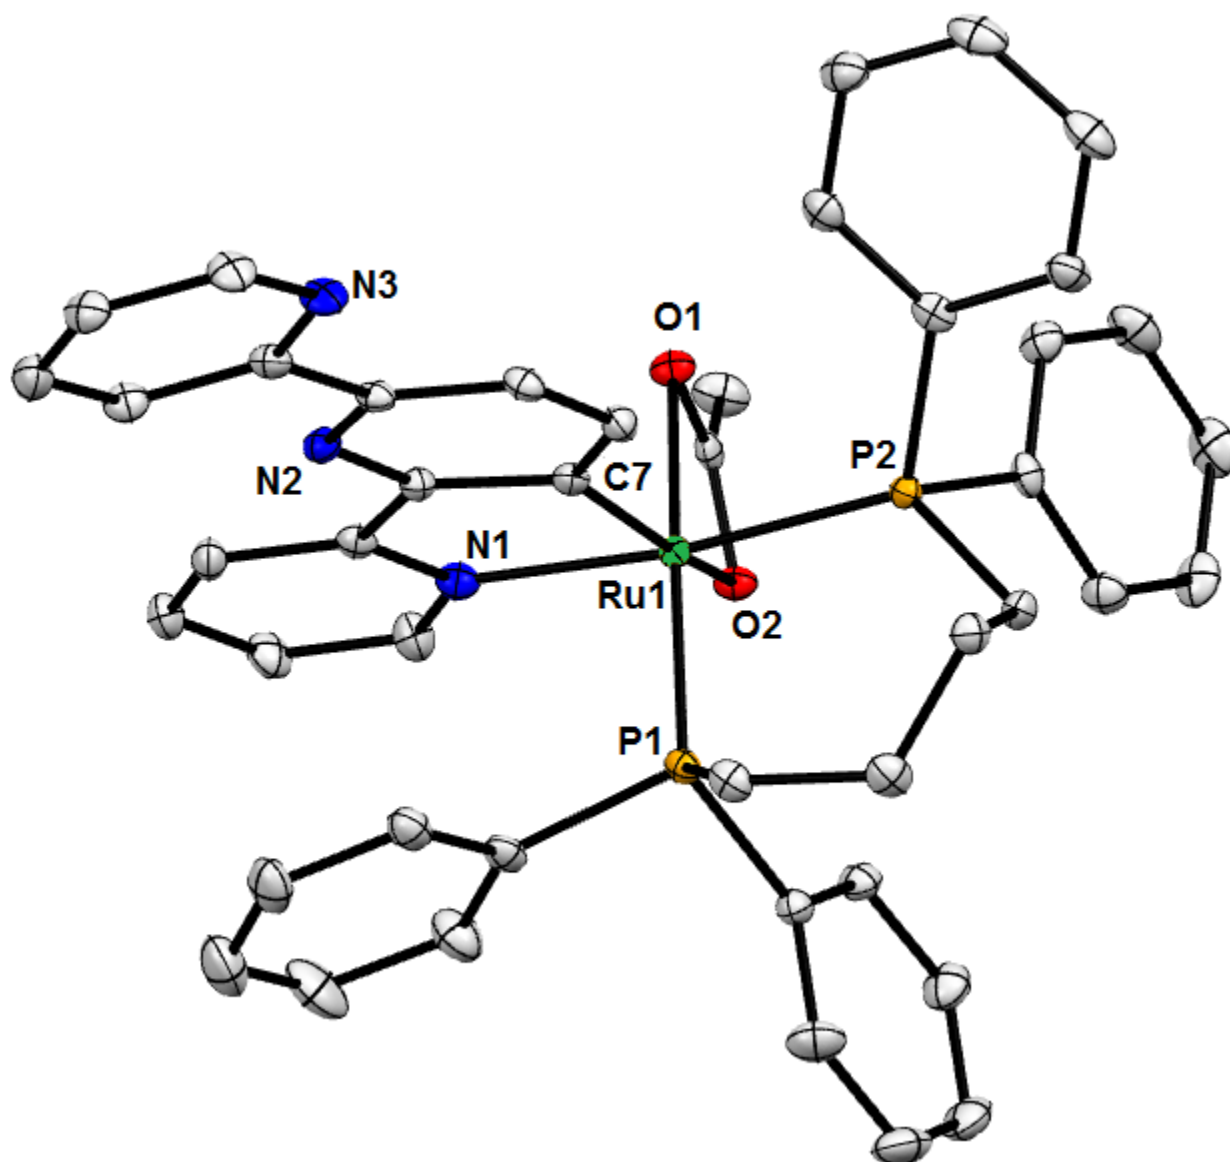

**Figure S42.** ORTEP style plot of compound **1** (one out of two independent molecules) in the solid state (CCDC 2302606) as determined by single crystal X-ray diffraction. Ellipsoids are displayed at the 50% probability level. Hydrogen atoms and co-crystallized solvent molecules are omitted for clarity.



## Single Crystal X-Ray Structure Determination of Compound 1 (CCDC 2302606).

### Detailed Crystallographic Data.

|                              |                                   |
|------------------------------|-----------------------------------|
| Diffraction operator:        | C. Jandl                          |
| Scanspeed                    | 2-20 s per frame                  |
| dx                           | 90 mm                             |
| Frames:                      | 2785 measured in 10 XYZ data sets |
| phi-scans with delta phi     | 0.5                               |
| omega-scans with delta omega | 0.5                               |
| shutterless mode             |                                   |

### Crystal Data:

|                                                                                                                            |                                                                                      |
|----------------------------------------------------------------------------------------------------------------------------|--------------------------------------------------------------------------------------|
| Chemical formula: $[\text{C}_{45}\text{H}_{41}\text{N}_3\text{O}_2\text{P}_2\text{Ru}] \cdot 1/2(\text{C}_7\text{H}_{16})$ | Density (calculated) = $1.396 \text{ g/cm}^3$                                        |
| Formula weight <u>868.91</u>                                                                                               | Absorption coefficient = $0.50 \text{ mm}^{-1}$                                      |
| <u>Monoclinic, <math>P 1 21/n 1</math></u>                                                                                 | <u>Mo <math>K\alpha</math> radiation, <math>\lambda = 0.71073 \text{ \AA}</math></u> |
| $a = 13.196(9) \text{ \AA}$ $\alpha = 90^\circ$                                                                            | $T = 100(2) \text{ K}$                                                               |
| $b = 44.86(3) \text{ \AA}$ $\beta = 101.096(16)^\circ$                                                                     | <u>Yellow fragment</u>                                                               |
| $c = 14.234(10) \text{ \AA}$ $\gamma = 90^\circ$                                                                           | <u><math>0.086 \times 0.125 \times 0.138 \text{ mm}</math></u>                       |
| $V = 8269(10) \text{ \AA}^3$                                                                                               |                                                                                      |
| $Z = 8$                                                                                                                    |                                                                                      |
| $F(000) = 3608$                                                                                                            |                                                                                      |

### Data collection:

|                                                    |                                                                          |
|----------------------------------------------------|--------------------------------------------------------------------------|
| <u>Bruker D8 Venture Duo IMS</u><br>diffractometer | <u>15129</u> independent reflections                                     |
| Radiation source: <u>IMS microsource, Mo</u>       | <u>12749</u> reflections with $I > 2\sigma(F^2)$                         |
| <u>Helios optic</u> monochromator                  | $R_{\text{int}} = 0.1777$                                                |
| Theta range for data collection                    | $\theta_{\text{max}} = 25.38^\circ$ , $\theta_{\text{min}} = 1.93^\circ$ |

|                                    |                                                                                      |
|------------------------------------|--------------------------------------------------------------------------------------|
| Index ranges                       | <u>-15</u> ≤ h ≤ <u>15</u> , <u>-54</u> ≤ k ≤ <u>54</u> , <u>-17</u> ≤ l ≤ <u>17</u> |
| Absorption correction              | Multi-Scan, <u>SADABS 2016/2, Bruker</u>                                             |
| Max. and min. transmission         | 0.9580 and 0.9340                                                                    |
| <u>189179</u> measured reflections | Coverage of independent reflections = 99.9%                                          |

Data refinement:

|                                   |                                                                                           |
|-----------------------------------|-------------------------------------------------------------------------------------------|
| Refinement method                 | Full-matrix least-squares on F <sup>2</sup>                                               |
| Refinement program                | SHELXL-2018/3 (Sheldrick, 2018)                                                           |
| Function minimized                | $\Sigma w(F_o^2 - F_c^2)^2$                                                               |
| Data / restraints / parameters    | <u>15129 / 0 / 1022</u>                                                                   |
| Final R indices                   | <u>15129</u> data; I > 2σ(I) R1 = 0.0472, wR2 = 0.0904                                    |
|                                   | all data R1 = 0.0614, wR2 = 0.0947                                                        |
|                                   | w = 1/[σ <sup>2</sup> (F <sub>o</sub> <sup>2</sup> ) + (0.0201P) <sup>2</sup> + 12.9123P] |
| Weighting scheme                  | where P = (F <sub>o</sub> <sup>2</sup> + 2F <sub>c</sub> <sup>2</sup> )/3                 |
| Δ/σ <sub>max</sub>                | <u>0.003</u>                                                                              |
| Goodness-of-fit on F <sup>2</sup> | <u>1.109</u>                                                                              |
| Largest diff. peak and hole       | <u>0.524 and -0.739</u> eÅ <sup>-3</sup>                                                  |
| R.M.S. deviation from mean        | <u>0.085</u> eÅ <sup>-3</sup>                                                             |

## References

- 83) *APEX suite of crystallographic software*, APEX 3, Version 2019-1.0, Bruker AXS Inc., Madison, Wisconsin, USA, 2019.
- 84) *SAINT*, Bruker AXS Inc., Version 8.40A, Madison, Wisconsin, WI, USA, 2019,
- 85) *SADABS* Bruker AXS Inc., Version 2016/2, Madison, Wisconsin, WI, USA, 2016.
- 86) G. M. Sheldrick, Crystal structure refinement with SHELXL. *Acta Crystallogr. Sect. A* **2015**, *71*, 3-8.
- 87) G. M. Sheldrick, SHELXT - Integrated space-group and crystal-structure determination. *Acta Crystallogr. Sect. C* **2015**, *71*, 3-8
- 88) C. B. Hübschle, G. M. Sheldrick, B. Dittrich, ShelXle: a Qt graphical user interface for SHELXL. *J. Appl. Cryst.* **2011**, *44*, 1281-1284.
- 89) *International Tables for Crystallography, Vol. C* (Ed.: A. J. Wilson), Kluwer Academic Publishers, Dordrecht, The Netherlands, **1992**, Tables 6.1.1.4 (pp. 500-502), 4.2.6.8 (pp. 219-222), and 4.2.4.2 (pp. 193-199).
- 90) C. F. Macrae, I. J. Bruno, J. A. Chisholm, P. R. Edgington, P. McCabe, E. Pidcock, L. Rodriguez-Monge, R. Taylor, J. van de Streek, P. A. Wood. Mercury CSD 2.0 - new features for the visualization and investigation of crystal structures. *J. Appl. Cryst.* **2008**, *41*, 466-470.
